# Supplementary material for: Pectolinarigenin regulates the tumor-associated proteins in AGS-xenograft BALB/c nude mice
Source: PubMed Central journal article supplement (PMC10869406; doi:10.1007/s11033-023-09046-4), 2024-02-16
Supplement: 11033_2023_9046_MOESM1_ESM.pdf [file 11033_2023_9046_MOESM1_ESM.pdf]

| No. | Accession No. | Description                                                                                 | Up/Down | Sum PEP Score | Coverage [%] | # Peptides | MW [kDa] | calc. pI | Abundances (Grouped): VC | Abundances (Grouped): PC | Abundances (Grouped): T1 | Abundances (Grouped): T2 |
|-----|---------------|---------------------------------------------------------------------------------------------|---------|---------------|--------------|------------|----------|----------|--------------------------|--------------------------|--------------------------|--------------------------|
| 1   | Q43707        | Alpha-actinin-4 [OS=Homo sapiens]                                                           | ↓       | 534.462       | 65           | 48         | 104.8    | 5.44     | 134.5                    | 97.3                     | 90.8                     | 77.4                     |
| 2   | P14625        | Endoplasmic [OS=Homo sapiens]                                                               | ↓       | 473.11        | 57           | 47         | 92.4     | 4.84     | 158.4                    | 85.9                     | 89                       | 66.7                     |
| 3   | P14618-2      | Isoform M1 of Pyruvate kinase PKM [OS=Homo sapiens]                                         | ↓       | 463.526       | 62           | 29         | 58       | 7.71     | 135.6                    | 80                       | 93.8                     | 90.6                     |
| 4   | P60709        | Actin, cytoplasmic 1 [OS=Homo sapiens]                                                      | ↓       | 433.137       | 77           | 20         | 41.7     | 5.48     | 126.7                    | 97                       | 95.1                     | 81.2                     |
| 5   | P12814-1      | Alpha-actinin-1 [OS=Homo sapiens]                                                           | ↓       | 409.082       | 64           | 42         | 103      | 5.41     | 127.2                    | 100.5                    | 96.2                     | 76.2                     |
| 6   | Q00610-1      | Clathrin heavy chain 1 [OS=Homo sapiens]                                                    | ↓       | 362.667       | 40           | 47         | 191.5    | 5.69     | 110.5                    | 114.1                    | 107.6                    | 67.8                     |
| 7   | P07900        | Heat shock protein HSP 90-alpha [OS=Homo sapiens]                                           | ↓       | 343.475       | 52           | 37         | 84.6     | 5.02     | 147.1                    | 82.1                     | 95.6                     | 75.1                     |
| 8   | P55072        | Transitional endoplasmic reticulum ATPase [OS=Homo sapiens]                                 | ↓       | 342.344       | 59           | 33         | 89.3     | 5.26     | 135                      | 104.4                    | 96.2                     | 64.5                     |
| 9   | P68371        | Tubulin beta-4B chain [OS=Homo sapiens]                                                     | ↓       | 316.999       | 73           | 24         | 49.8     | 4.89     | 146.1                    | 90.7                     | 87.5                     | 75.7                     |
| 10  | P00558        | phosphoglycerate kinase 1 [OS=Homo sapiens]                                                 | ↑       | 309.017       | 69           | 24         | 44.6     | 8.1      | 74.3                     | 121.3                    | 85.3                     | 119.2                    |
| 11  | P10809        | 60 kDa heat shock protein, mitochondrial [OS=Homo sapiens]                                  | ↓       | 305.116       | 58           | 28         | 61       | 5.87     | 139.6                    | 84.3                     | 98.5                     | 77.6                     |
| 12  | P08238        | Heat shock protein HSP 90-beta [OS=Homo sapiens]                                            | ↓       | 303.807       | 56           | 36         | 83.2     | 5.03     | 148                      | 90.4                     | 93.9                     | 67.6                     |
| 13  | P22314        | Ubiquitin-like modifier-activating enzyme 1 [OS=Homo sapiens]                               | ↓       | 299.815       | 45           | 30         | 117.8    | 5.76     | 154.9                    | 92.5                     | 88.3                     | 64.3                     |
| 14  | P68363        | Tubulin alpha-1B chain [OS=Homo sapiens]                                                    | ↓       | 258.546       | 64           | 20         | 50.1     | 5.06     | 139.2                    | 90.3                     | 91.2                     | 79.3                     |
| 15  | P30740        | Leukocyte elastase inhibitor [OS=Homo sapiens]                                              | ↓       | 241.624       | 57           | 20         | 42.7     | 6.28     | 118.5                    | 78                       | 112.7                    | 90.8                     |
| 16  | Q01082-1      | Spectrin beta chain, non-erythrocytic 1 [OS=Homo sapiens]                                   | ↓       | 239.824       | 19           | 34         | 274.4    | 5.57     | 132.6                    | 91.3                     | 98.3                     | 77.9                     |
| 17  | Q13885        | Tubulin beta-2A chain [OS=Homo sapiens]                                                     | ↓       | 238.561       | 55           | 19         | 49.9     | 4.89     | 120.9                    | 107.6                    | 98.9                     | 72.6                     |
| 18  | Q9BQE3        | Tubulin alpha-1C chain [OS=Homo sapiens]                                                    | ↓       | 238.347       | 64           | 20         | 49.9     | 5.1      | 136.4                    | 100.2                    | 87.9                     | 75.5                     |
| 19  | P12956        | X-ray repair cross-complementing protein 6 [OS=Homo sapiens]                                | ↓       | 234.006       | 46           | 24         | 69.8     | 6.64     | 149.9                    | 81.3                     | 98                       | 70.7                     |
| 20  | P00338-1      | L-lactate dehydrogenase A chain [OS=Homo sapiens]                                           | ↑       | 204.572       | 73           | 21         | 36.7     | 8.27     | 76.8                     | 118.8                    | 89.1                     | 115.4                    |
| 21  | P21333        | Filamin-A [OS=Homo sapiens]                                                                 | ↓       | 204.041       | 20           | 34         | 280.6    | 6.06     | 123.8                    | 118.5                    | 85.2                     | 72.6                     |
| 22  | Q15084-1      | Protein disulfide-isomerase A6 [OS=Homo sapiens]                                            | ↓       | 198.108       | 43           | 15         | 48.1     | 5.08     | 151.5                    | 89.5                     | 86.9                     | 72.1                     |
| 23  | P49411        | elongation factor Tu, mitochondrial [OS=Homo sapiens]                                       | ↓       | 196.835       | 48           | 19         | 49.5     | 7.61     | 158.6                    | 77.5                     | 91.9                     | 72.1                     |
| 24  | P61978        | Heterogeneous nuclear ribonucleoprotein K [OS=Homo sapiens]                                 | ↓       | 186.74        | 52           | 19         | 50.9     | 5.54     | 137.3                    | 91                       | 90.2                     | 81.5                     |
| 25  | P13010        | X-ray repair cross-complementing protein 5 [OS=Homo sapiens]                                | ↓       | 184.96        | 44           | 22         | 82.7     | 5.81     | 132.1                    | 94.1                     | 97.8                     | 76                       |
| 26  | O75369-1      | Filamin-B [OS=Homo sapiens]                                                                 | ↓       | 181.88        | 17           | 32         | 278      | 5.73     | 140.3                    | 99.4                     | 89.8                     | 70.5                     |
| 27  | P68104        | Elongation factor 1-alpha 1 [OS=Homo sapiens]                                               | ↓       | 180.323       | 53           | 16         | 50.1     | 9.01     | 124.1                    | 102.1                    | 97.7                     | 76.1                     |
| 28  | P07098        | Gastric triacylglycerol lipase [OS=Homo sapiens]                                            | ↓       | 179.373       | 53           | 13         | 45.2     | 7.33     | 121.9                    | 84.1                     | 127.5                    | 66.5                     |
| 29  | P09429        | High mobility group protein B1 [OS=Homo sapiens]                                            | ↑       | 178.422       | 44           | 10         | 24.9     | 5.74     | 75.3                     | 98.1                     | 102.5                    | 124.1                    |
| 30  | P42704        | Leucine-rich PPR motif-containing protein, mitochondrial [OS=Homo sapiens]                  | ↓       | 176.963       | 30           | 30         | 157.8    | 6.13     | 151.7                    | 74.8                     | 97.6                     | 75.9                     |
| 31  | P11047        | Laminin subunit gamma-1 [OS=Homo sapiens]                                                   | ↑       | 169.249       | 16           | 22         | 177.5    | 5.12     | 29                       | 204.7                    | 36.2                     | 130.1                    |
| 32  | Q9Y4L1        | Hypoxia up-regulated protein 1 [OS=Homo sapiens]                                            | ↓       | 166.85        | 29           | 19         | 111.3    | 5.22     | 147.9                    | 77.7                     | 100.2                    | 74.2                     |
| 33  | Q13263        | Transcription intermediary factor 1-beta [OS=Homo sapiens]                                  | ↓       | 164.121       | 35           | 20         | 88.5     | 5.77     | 131.5                    | 90.3                     | 92.1                     | 86.1                     |
| 34  | P51991-1      | Heterogeneous nuclear ribonucleoprotein A3 [OS=Homo sapiens]                                | ↑       | 158.043       | 39           | 17         | 39.6     | 9.01     | 87.7                     | 135.4                    | 87                       | 89.9                     |
| 35  | Q13509        | tubulin beta-3 chain [OS=Homo sapiens]                                                      | ↓       | 155.987       | 38           | 14         | 50.4     | 4.93     | 119.3                    | 93.3                     | 108.9                    | 78.5                     |
| 36  | Q99873        | protein arginine N-methyltransferase 1 [OS=Homo sapiens]                                    | ↑       | 154.893       | 46           | 17         | 41.5     | 5.43     | 87.1                     | 92.6                     | 99.1                     | 121.2                    |
| 37  | Q9Y490        | Talin-1 [OS=Homo sapiens]                                                                   | ↓       | 153.017       | 14           | 21         | 269.6    | 6.07     | 124.7                    | 104.8                    | 105.4                    | 65.1                     |
| 38  | P36578        | 60S ribosomal protein L4 [OS=Homo sapiens]                                                  | ↑       | 148.526       | 40           | 17         | 47.7     | 11.06    | 16.6                     | 104.2                    | 131.9                    | 147.4                    |
| 39  | Q96QK1        | Vacuolar protein sorting-associated protein 35 [OS=Homo sapiens]                            | ↓       | 145.882       | 28           | 17         | 91.6     | 5.49     | 151.4                    | 79.5                     | 91.1                     | 78                       |
| 40  | Q7Z406-1      | myosin-14 [OS=Homo sapiens]                                                                 | ↓       | 145.357       | 14           | 20         | 227.7    | 5.6      | 131.8                    | 89.9                     | 95.7                     | 82.6                     |
| 41  | P14866        | Heterogeneous nuclear ribonucleoprotein L [OS=Homo sapiens]                                 | ↓       | 141.058       | 41           | 14         | 64.1     | 8.22     | 139.5                    | 96.4                     | 87.6                     | 76.5                     |
| 42  | Q07065        | Cytoskeleton-associated protein 4 [OS=Homo sapiens]                                         | ↓       | 139.759       | 33           | 15         | 66       | 5.92     | 129.6                    | 105.6                    | 87.8                     | 77                       |
| 43  | Q7KZF4        | staphylococcal nuclease domain-containing protein 1 [OS=Homo sapiens]                       | ↓       | 136.53        | 29           | 19         | 101.9    | 7.17     | 112.5                    | 103.3                    | 103.6                    | 80.6                     |
| 44  | P36871-1      | Phosphoglucomutase-1 [OS=Homo sapiens]                                                      | ↓       | 133.924       | 50           | 19         | 61.4     | 6.76     | 138.4                    | 100.4                    | 92.3                     | 68.9                     |
| 45  | P67809        | Nuclease-sensitive element-binding protein 1 [OS=Homo sapiens]                              | ↑       | 131.425       | 50           | 10         | 35.9     | 9.88     | 68.9                     | 105.6                    | 108                      | 117.5                    |
| 46  | P07942        | Laminin subunit beta-1 [OS=Homo sapiens]                                                    | ↑       | 131.013       | 15           | 22         | 197.9    | 4.94     | 33.7                     | 194.9                    | 43.1                     | 128.2                    |
| 47  | P62424        | 60S ribosomal protein L7a [OS=Homo sapiens]                                                 | ↑       | 127.357       | 50           | 16         | 30       | 10.61    | 25.7                     | 115.4                    | 137.9                    | 121                      |
| 48  | Q92841        | Probable ATP-dependent RNA helicase DDX17 [OS=Homo sapiens]                                 | ↓       | 127.148       | 38           | 22         | 80.2     | 8.27     | 150.7                    | 89.1                     | 91.7                     | 68.5                     |
| 49  | P62805        | histone H4 [OS=Homo sapiens]                                                                | ↑       | 125.5         | 53           | 9          | 11.4     | 11.36    | 33.6                     | 113.3                    | 111.7                    | 141.4                    |
| 50  | O00299        | chloride intracellular channel protein 1 [OS=Homo sapiens]                                  | ↓       | 125.427       | 78           | 14         | 26.9     | 5.17     | 135.7                    | 83.7                     | 99.2                     | 81.4                     |
| 51  | P40939        | Trifunctional enzyme subunit alpha, mitochondrial [OS=Homo sapiens]                         | ↓       | 124.14        | 34           | 16         | 82.9     | 9.04     | 128.6                    | 83.3                     | 106.3                    | 81.9                     |
| 52  | P00505        | Aspartate aminotransferase, mitochondrial [OS=Homo sapiens]                                 | ↑       | 120.919       | 48           | 17         | 47.5     | 9.01     | 77.5                     | 92.5                     | 119.3                    | 110.7                    |
| 53  | P13929-1      | Beta-enolase [OS=Homo sapiens]                                                              | ↓       | 120.231       | 45           | 12         | 47       | 7.71     | 102.3                    | 80.6                     | 175.4                    | 41.6                     |
| 54  | P12882        | Myosin-1 [OS=Homo sapiens]                                                                  | ↓       | 119.806       | 13           | 20         | 223      | 5.74     | 76.9                     | 18.3                     | 288.1                    | 16.7                     |
| 55  | P07814        | Bifunctional glutamate/proline-tRNA ligase [OS=Homo sapiens]                                | ↓       | 118.906       | 21           | 22         | 170.5    | 7.33     | 133.2                    | 88.1                     | 105.7                    | 73.1                     |
| 56  | Q01105-2      | Isoform 2 of Protein SET [OS=Homo sapiens]                                                  | ↑       | 118.705       | 39           | 8          | 32.1     | 4.22     | 75.4                     | 96.8                     | 107.3                    | 120.5                    |
| 57  | P61158        | actin-related protein 3 [OS=Homo sapiens]                                                   | ↓       | 116.357       | 55           | 14         | 47.3     | 5.88     | 147.2                    | 94.1                     | 84                       | 74.7                     |
| 58  | Q9UL46        | proteasome activator complex subunit 2 [OS=Homo sapiens]                                    | ↓       | 114.311       | 68           | 12         | 27.4     | 5.73     | 127.6                    | 91.4                     | 100.9                    | 80.1                     |
| 59  | P30153        | serine/threonine-protein phosphatase 2A 65 kDa regulatory subunit A alpha [OS=Homo sapiens] | ↓       | 113.911       | 35           | 15         | 65.3     | 5.11     | 131.4                    | 87.8                     | 99.3                     | 81.5                     |
| 60  | P62158        | Calmodulin [OS=Homo sapiens]                                                                | ↑       | 111.686       | 77           | 10         | 16.8     | 4.22     | 71.5                     | 95.8                     | 99.2                     | 133.4                    |
| 61  | P09874        | Poly [ADP-ribose] polymerase 1 [OS=Homo sapiens]                                            | ↓       | 108.865       | 24           | 16         | 113      | 8.88     | 126.1                    | 82.1                     | 108.3                    | 83.4                     |
| 62  | P54652        | Heat shock-related 70 kDa protein 2 [OS=Homo sapiens]                                       | ↓       | 108.366       | 16           | 9          | 70       | 5.74     | 126.4                    | 96.9                     | 79.4                     | 97.2                     |

|     |           |                                                                                         |   |         |    |    |       |       |       |       |       |       |
|-----|-----------|-----------------------------------------------------------------------------------------|---|---------|----|----|-------|-------|-------|-------|-------|-------|
| 63  | P67936    | Tropomyosin alpha-4 chain [OS=Homo sapiens]                                             | ↑ | 106.018 | 42 | 13 | 28.5  | 4.69  | 78.3  | 90.9  | 95.8  | 135   |
| 64  | Q15365    | Poly(RC)-binding protein 1 [OS=Homo sapiens]                                            | ↓ | 105.802 | 63 | 13 | 37.5  | 7.09  | 139.4 | 89    | 93    | 78.7  |
| 65  | P07910-1  | Heterogeneous nuclear ribonucleoproteins C1/C2 [OS=Homo sapiens]                        | ↑ | 105.271 | 39 | 12 | 33.7  | 5.08  | 76.1  | 113.1 | 79.5  | 131.3 |
| 66  | P21796    | voltage-dependent anion-selective channel protein 1 [OS=Homo sapiens]                   | ↓ | 104.949 | 47 | 11 | 30.8  | 8.54  | 150.3 | 85.4  | 88.5  | 75.9  |
| 67  | Q08211    | Atp-dependent rna helicase a [OS=Homo sapiens]                                          | ↓ | 104.814 | 18 | 17 | 140.9 | 6.84  | 125.3 | 90.4  | 111   | 73.3  |
| 68  | Q99623    | Prohibitin-2 [OS=Homo sapiens]                                                          | ↓ | 104.78  | 50 | 12 | 33.3  | 9.83  | 123.8 | 91    | 100.2 | 85    |
| 69  | Q75367-1  | Core histone macro-H2A.1 [OS=Homo sapiens]                                              | ↑ | 104.583 | 48 | 12 | 39.6  | 9.79  | 70.7  | 101.7 | 116.4 | 111.2 |
| 70  | Q02878    | 60S ribosomal protein L6 [OS=Homo sapiens]                                              | ↑ | 104.156 | 38 | 13 | 32.7  | 10.58 | 12.8  | 105.3 | 123.3 | 158.6 |
| 71  | P26599    | Polypyrimidine tract-binding protein 1 [OS=Homo sapiens]                                | ↓ | 103.879 | 31 | 11 | 57.2  | 9.17  | 139.8 | 93.4  | 89.9  | 76.9  |
| 72  | Q12906-1  | Interleukin enhancer-binding factor 3 [OS=Homo sapiens]                                 | ↓ | 103.633 | 24 | 18 | 95.3  | 8.76  | 140.9 | 83.6  | 99.7  | 75.8  |
| 73  | Q14980-1  | nuclear mitotic apparatus protein 1 [OS=Homo sapiens]                                   | ↓ | 102.059 | 12 | 17 | 238.1 | 5.78  | 131.4 | 88.7  | 98.7  | 81.2  |
| 74  | O15144    | Actin-related protein 2/3 complex subunit 2 [OS=Homo sapiens]                           | ↓ | 101.053 | 53 | 10 | 34.3  | 7.36  | 122.5 | 108.4 | 92.4  | 76.7  |
| 75  | P35232    | Prohibitin [OS=Homo sapiens]                                                            | ↓ | 100.507 | 61 | 12 | 29.8  | 5.76  | 153.8 | 75.8  | 92.5  | 78    |
| 76  | Q13200    | 26S proteasome non-ATPase regulatory subunit 2 [OS=Homo sapiens]                        | ↓ | 98.233  | 24 | 15 | 100.1 | 5.2   | 129.9 | 116.7 | 87.9  | 65.6  |
| 77  | P62136-1  | serine/threonine-protein phosphatase PP1-alpha catalytic subunit [OS=Homo sapiens]      | ↓ | 97.692  | 50 | 13 | 37.5  | 6.33  | 113.6 | 113.6 | 94.2  | 75.6  |
| 78  | P51659-1  | peroxisomal multifunctional enzyme type 2 [OS=Homo sapiens]                             | ↓ | 96.358  | 32 | 15 | 79.6  | 8.84  | 134.2 | 89.8  | 96.1  | 79.9  |
| 79  | Q60701    | UDP-glucose 6-dehydrogenase [OS=Homo sapiens]                                           | ↓ | 95.365  | 37 | 12 | 55    | 7.12  | 160.5 | 70    | 103.5 | 66    |
| 80  | Q71D13    | histone H3.2 [OS=Homo sapiens]                                                          | ↑ | 95.07   | 43 | 5  | 15.4  | 11.27 | 45.8  | 124.3 | 111.6 | 118.3 |
| 81  | P18124    | 60S ribosomal protein L7 [OS=Homo sapiens]                                              | ↑ | 94.313  | 51 | 13 | 29.2  | 10.65 | 18.2  | 110.4 | 126.2 | 145.2 |
| 82  | P06753    | Tropomyosin alpha-3 chain [OS=Homo sapiens]                                             | ↑ | 92.67   | 27 | 12 | 32.9  | 4.72  | 63.8  | 111.1 | 136.5 | 88.7  |
| 83  | Q00341-1  | Vigilin [OS=Homo sapiens]                                                               | ↓ | 92.093  | 17 | 15 | 141.4 | 6.87  | 131.2 | 89.3  | 98    | 81.5  |
| 84  | Q9BS26    | Endoplasmic reticulum resident protein 44 [OS=Homo sapiens]                             | ↓ | 91.911  | 37 | 10 | 46.9  | 5.26  | 152.1 | 89.7  | 94.9  | 63.3  |
| 85  | P62906    | 60S ribosomal protein L10A [OS=Homo sapiens]                                            | ↑ | 91.226  | 38 | 8  | 24.8  | 9.94  | 23.5  | 116.2 | 124.8 | 135.5 |
| 86  | P68431    | Histone H3.1 [OS=Homo sapiens]                                                          | ↑ | 91.046  | 43 | 5  | 15.4  | 11.12 | 50.1  | 111.9 | 113.7 | 124.2 |
| 87  | P08670    | Vimentin [OS=Homo sapiens]                                                              | ↑ | 90.928  | 35 | 15 | 53.6  | 5.12  | 57.2  | 166.2 | 80.1  | 96.5  |
| 88  | P07339    | Cathepsin D [OS=Homo sapiens]                                                           | ↓ | 90.776  | 34 | 12 | 44.5  | 6.54  | 138.2 | 101.9 | 87.9  | 72    |
| 89  | Q15181    | Inorganic pyrophosphatase [OS=Homo sapiens]                                             | ↓ | 90.574  | 55 | 11 | 32.6  | 5.86  | 149   | 91.5  | 92.5  | 67    |
| 90  | P40227-1  | T-complex protein 1 subunit zeta [OS=Homo sapiens]                                      | ↓ | 88.452  | 32 | 11 | 58    | 6.68  | 142.5 | 94    | 92.9  | 70.6  |
| 91  | Q14974    | Importin subunit beta-1 [OS=Homo sapiens]                                               | ↓ | 88.278  | 20 | 12 | 97.1  | 4.78  | 136   | 95.4  | 88.5  | 80.2  |
| 92  | P62140    | Serine/threonine-protein phosphatase PP1-beta catalytic subunit [OS=Homo sapiens]       | ↓ | 86.762  | 43 | 11 | 37.2  | 6.19  | 129   | 105.6 | 97.8  | 67.5  |
| 93  | P43243    | Matrin-3 [OS=Homo sapiens]                                                              | ↓ | 86.447  | 21 | 12 | 94.6  | 6.25  | 136.4 | 99    | 87.9  | 76.7  |
| 94  | P09488    | Glutathione S-transferase Mu 1 [OS=Homo sapiens]                                        | ↑ | 86.013  | 51 | 11 | 25.7  | 6.7   | 81.6  | 131   | 86.5  | 100.9 |
| 95  | Q12905    | Interleukin enhancer-binding factor 2 [OS=Homo sapiens]                                 | ↓ | 85.985  | 46 | 11 | 43    | 5.26  | 150.1 | 80.3  | 97.1  | 72.5  |
| 96  | P18206    | Vinculin [OS=Homo sapiens]                                                              | ↓ | 84.518  | 18 | 14 | 123.7 | 5.66  | 125.8 | 107.5 | 91.6  | 75.1  |
| 97  | Q1KMD3    | heterogeneous nuclear ribonucleoprotein U-like protein 2 [OS=Homo sapiens]              | ↓ | 82.744  | 20 | 11 | 85.1  | 4.91  | 123.8 | 89.5  | 109.7 | 77    |
| 98  | P16402    | Histone H1.3 [OS=Homo sapiens]                                                          | ↑ | 82.632  | 24 | 8  | 22.3  | 11.02 | 24    | 116.1 | 111.6 | 148.3 |
| 99  | P48643    | T-complex protein 1 subunit epsilon [OS=Homo sapiens]                                   | ↓ | 81.993  | 35 | 13 | 59.6  | 5.66  | 155.7 | 86.7  | 86.8  | 70.8  |
| 100 | P26583    | High mobility group protein B2 [OS=Homo sapiens]                                        | ↑ | 81.916  | 37 | 9  | 24    | 7.81  | 90.1  | 135.9 | 84.3  | 89.6  |
| 101 | P09493-10 | Isoform 10 of Tropomyosin alpha-1 chain [OS=Homo sapiens]                               | ↑ | 80.821  | 30 | 12 | 32.8  | 4.77  | 81.6  | 101.7 | 128   | 88.7  |
| 102 | Q01518-1  | adenylyl cyclase-associated protein 1 [OS=Homo sapiens]                                 | ↓ | 80.441  | 36 | 12 | 51.9  | 8.06  | 136.1 | 91.9  | 98.9  | 73.1  |
| 103 | Q9NSE4    | Isoleucine--tRNA ligase, mitochondrial [OS=Homo sapiens]                                | ↓ | 80.209  | 26 | 17 | 113.7 | 7.2   | 153.3 | 84.1  | 99.1  | 63.5  |
| 104 | P05388    | 60S acidic ribosomal protein P0 [OS=Homo sapiens]                                       | ↓ | 80.031  | 45 | 10 | 34.3  | 5.97  | 132.4 | 99.6  | 96.6  | 71.4  |
| 105 | P49368-1  | T-complex protein 1 subunit gamma [OS=Homo sapiens]                                     | ↓ | 79.864  | 30 | 13 | 60.5  | 6.49  | 148   | 89    | 93.7  | 69.3  |
| 106 | P78371-1  | T-complex protein 1 subunit beta [OS=Homo sapiens]                                      | ↓ | 79.003  | 26 | 9  | 57.5  | 6.46  | 154.3 | 82.7  | 95.9  | 67.1  |
| 107 | P08779    | Keratin, type I cytoskeletal 16 [OS=Homo sapiens]                                       | ↓ | 77.167  | 33 | 13 | 51.2  | 5.05  | 119.7 | 85    | 141.6 | 53.7  |
| 108 | P47756-2  | Isoform 2 of F-actin-capping protein subunit beta [OS=Homo sapiens]                     | ↓ | 75.009  | 35 | 8  | 30.6  | 6     | 123.7 | 93.3  | 99.8  | 83.2  |
| 109 | Q00571    | ATP-dependent RNA helicase DDX3X [OS=Homo sapiens]                                      | ↓ | 74.853  | 24 | 12 | 73.2  | 7.18  | 125.3 | 100.6 | 100.2 | 74    |
| 110 | Q16777    | Histone H2A type 2-C [OS=Homo sapiens]                                                  | ↑ | 74.593  | 58 | 5  | 14    | 10.9  | 65    | 105   | 98.8  | 131.2 |
| 111 | P52565-1  | rho GDP-dissociation inhibitor 1 [OS=Homo sapiens]                                      | ↓ | 74.556  | 43 | 7  | 23.2  | 5.11  | 134.2 | 103.3 | 88    | 74.5  |
| 112 | P53621-1  | coatomer subunit alpha [OS=Homo sapiens]                                                | ↓ | 73.791  | 17 | 16 | 138.3 | 7.66  | 135.7 | 90.4  | 97.1  | 76.9  |
| 113 | P27816-1  | Microtubule-associated protein 4 [OS=Homo sapiens]                                      | ↑ | 73.765  | 11 | 9  | 120.9 | 5.43  | 68.7  | 102.4 | 101.8 | 127.1 |
| 114 | P08758    | annexin A5 [OS=Homo sapiens]                                                            | ↑ | 73.395  | 34 | 11 | 35.9  | 5.05  | 62    | 169.5 | 80.3  | 88.3  |
| 115 | Q9Y3Z3    | deoxynucleoside triphosphate triphosphohydrolase SAMHD1 [OS=Homo sapiens]               | ↓ | 73.254  | 30 | 12 | 72.2  | 7.14  | 160.3 | 83.9  | 94.4  | 61.4  |
| 116 | P25391    | Laminin subunit alpha-1 [OS=Homo sapiens]                                               | ↑ | 72.967  | 5  | 13 | 336.9 | 6.35  | 27.8  | 177.4 | 49.7  | 145.1 |
| 117 | P52907    | F-actin-capping protein subunit alpha-1 [OS=Homo sapiens]                               | ↓ | 72.714  | 46 | 9  | 32.9  | 5.69  | 126.3 | 84.5  | 104.7 | 84.5  |
| 118 | Q92499    | ATP-dependent RNA helicase DDX1 [OS=Homo sapiens]                                       | ↓ | 72.673  | 20 | 10 | 82.4  | 7.23  | 162.6 | 78.9  | 89    | 69.5  |
| 119 | P46777    | 60S ribosomal protein L5 [OS=Homo sapiens]                                              | ↑ | 72.158  | 33 | 8  | 34.3  | 9.72  | 60.5  | 117.2 | 118.3 | 104   |
| 120 | Q9UBT2    | SUMO-activating enzyme subunit 2 [OS=Homo sapiens]                                      | ↓ | 70.63   | 30 | 11 | 71.2  | 5.29  | 152.8 | 76.6  | 97.3  | 73.3  |
| 121 | P26440    | Isovaleryl-CoA dehydrogenase, mitochondrial [OS=Homo sapiens]                           | ↑ | 70.593  | 34 | 10 | 46.3  | 8.19  | 74.5  | 92.6  | 111.2 | 121.7 |
| 122 | P06732    | Creatine kinase M-type [OS=Homo sapiens]                                                | ↓ | 70.341  | 30 | 8  | 43.1  | 7.25  | 97.4  | 26.6  | 255   | 21.1  |
| 123 | P39656    | Dolichyl-diphosphooligosaccharide--protein glycosyltransferase 48 kDa [OS=Homo sapiens] | ↓ | 70.216  | 45 | 13 | 50.8  | 6.55  | 120.5 | 92.5  | 104.9 | 82.1  |
| 124 | P22695    | Cytochrome b-c1 complex subunit 2, mitochondrial [OS=Homo sapiens]                      | ↓ | 69.685  | 36 | 8  | 48.4  | 8.63  | 141.8 | 79.5  | 108.1 | 70.6  |
| 125 | O95865    | NG,N(G)-dimethylarginine dimethylaminohydrolase 2 [OS=Homo sapiens]                     | ↓ | 69.434  | 75 | 11 | 29.6  | 6.01  | 134.2 | 92.6  | 87    | 86.2  |

|     |          |                                                                                        |   |        |    |    |       |       |       |       |       |       |
|-----|----------|----------------------------------------------------------------------------------------|---|--------|----|----|-------|-------|-------|-------|-------|-------|
| 126 | P23229-1 | integrin alpha-6 [OS=Homo sapiens]                                                     | ↓ | 69.311 | 14 | 12 | 126.5 | 6.61  | 129.9 | 94.7  | 98.8  | 76.7  |
| 127 | O14579-1 | coatamer subunit epsilon [OS=Homo sapiens]                                             | ↓ | 68.946 | 38 | 6  | 34.5  | 5.12  | 129.5 | 96.2  | 92.4  | 81.9  |
| 128 | P31930   | Cytochrome b-c1 complex subunit 1, mitochondrial [OS=Homo sapiens]                     | ↓ | 68.403 | 33 | 10 | 52.6  | 6.37  | 158.6 | 72.9  | 95.9  | 72.7  |
| 129 | P40121   | Macrophage-capping protein [OS=Homo sapiens]                                           | ↓ | 68.053 | 32 | 7  | 38.5  | 6.19  | 132.9 | 91.9  | 93.2  | 82    |
| 130 | P55084   | Trifunctional enzyme subunit beta, mitochondrial [OS=Homo sapiens]                     | ↓ | 66.823 | 43 | 14 | 51.3  | 9.41  | 139.3 | 85.3  | 99.6  | 75.7  |
| 131 | Q9NYU2-1 | UDP-glucose:glycoprotein glucosyltransferase 1 [OS=Homo sapiens]                       | ↓ | 66.371 | 12 | 12 | 177.1 | 5.63  | 151.4 | 79.9  | 108.9 | 59.7  |
| 132 | P28331-1 | NADH-ubiquinone oxidoreductase 75 kDa subunit, mitochondrial [OS=Homo sapiens]         | ↓ | 65.916 | 20 | 9  | 79.4  | 6.23  | 150.5 | 87    | 96.6  | 65.9  |
| 133 | P07384   | Calpain-1 catalytic subunit [OS=Homo sapiens]                                          | ↓ | 65.262 | 20 | 12 | 81.8  | 5.67  | 114.9 | 102.6 | 102.3 | 80.2  |
| 134 | Q15233   | Non-POU domain-containing octamer-binding protein [OS=Homo sapiens]                    | ↓ | 65.147 | 19 | 6  | 54.2  | 8.95  | 128.4 | 99.7  | 101.8 | 70.2  |
| 135 | Q15019   | septin-2 [OS=Homo sapiens]                                                             | ↓ | 64.822 | 32 | 7  | 41.5  | 6.6   | 135.9 | 113.1 | 86    | 64.9  |
| 136 | P09104   | Gamma-enolase [OS=Homo sapiens]                                                        | ↑ | 64.817 | 20 | 6  | 47.2  | 5.03  | 72.1  | 157.3 | 59.4  | 111.1 |
| 137 | P43686   | 26S proteasome regulatory subunit 6B [OS=Homo sapiens]                                 | ↓ | 64.455 | 33 | 7  | 47.3  | 5.21  | 162.6 | 81.5  | 90.6  | 65.2  |
| 138 | P17931   | Galectin-3 [OS=Homo sapiens]                                                           | ↓ | 64.343 | 28 | 6  | 26.1  | 8.56  | 125.3 | 106.8 | 82.9  | 85    |
| 139 | Q9Y265   | RuvB-like 1 [OS=Homo sapiens]                                                          | ↓ | 62.453 | 28 | 9  | 50.2  | 6.42  | 143.6 | 93.4  | 90.6  | 72.4  |
| 140 | P39023   | 60S ribosomal protein L3 [OS=Homo sapiens]                                             | ↑ | 62.388 | 28 | 8  | 46.1  | 10.18 | 30.4  | 111.7 | 131.1 | 126.7 |
| 141 | Q9UKV3-1 | Apoptotic chromatin condensation inducer in the nucleus [OS=Homo sapiens]              | ↓ | 62.276 | 9  | 10 | 151.8 | 6.43  | 119.5 | 72.2  | 102.8 | 105.6 |
| 142 | P62826   | GTP-binding nuclear protein RAN [OS=Homo sapiens]                                      | ↓ | 61.387 | 39 | 7  | 24.4  | 7.49  | 120.8 | 97.3  | 103   | 78.8  |
| 143 | P36776   | Lon protease homolog, mitochondrial [OS=Homo sapiens]                                  | ↓ | 61.352 | 16 | 9  | 106.4 | 6.39  | 139.6 | 85.1  | 102.4 | 72.9  |
| 144 | P62241   | 40S ribosomal protein S8 [OS=Homo sapiens]                                             | ↑ | 61.294 | 38 | 7  | 24.2  | 10.32 | 44    | 126.3 | 126.5 | 103.2 |
| 145 | P09493-5 | Isoform 5 of Tropomyosin alpha-1 chain [OS=Homo sapiens]                               | ↑ | 61.084 | 27 | 9  | 28.4  | 4.77  | 32.6  | 119.7 | 107.5 | 140.3 |
| 146 | Q86VP6-1 | cullin-associated nedd8-dissociated protein 1 [OS=Homo sapiens]                        | ↓ | 60.399 | 13 | 10 | 136.3 | 5.78  | 119.5 | 104.8 | 98    | 77.7  |
| 147 | Q03013-1 | glutathione S-transferase mu 4 [OS=Homo sapiens]                                       | ↑ | 60.171 | 36 | 7  | 25.5  | 5.9   | 62.6  | 105.9 | 111.6 | 119.9 |
| 148 | Q15149-1 | plectin [OS=Homo sapiens]                                                              | ↓ | 60.097 | 3  | 9  | 531.5 | 5.96  | 134.6 | 95    | 95.1  | 75.4  |
| 149 | P45974-1 | Ubiquitin carboxyl-terminal hydrolase 5 [OS=Homo sapiens]                              | ↓ | 60.02  | 15 | 9  | 95.7  | 5.03  | 157   | 85.5  | 90.7  | 66.8  |
| 150 | P21964-1 | Catechol O-methyltransferase [OS=Homo sapiens]                                         | ↓ | 59.996 | 39 | 7  | 30    | 5.47  | 123.8 | 96    | 102.5 | 77.7  |
| 151 | P11413-1 | Glucose-6-phosphate 1-dehydrogenase [OS=Homo sapiens]                                  | ↓ | 59.911 | 26 | 12 | 59.2  | 6.84  | 127.3 | 87.1  | 105.9 | 79.7  |
| 152 | Q96HE7   | ERO1-like protein alpha [OS=Homo sapiens]                                              | ↓ | 59.35  | 30 | 10 | 54.4  | 5.68  | 135.7 | 109.1 | 76.2  | 79    |
| 153 | Q15029   | 116 kDa U5 small nuclear ribonucleoprotein component [OS=Homo sapiens]                 | ↓ | 58.96  | 14 | 10 | 109.4 | 5     | 132.9 | 101.7 | 93.6  | 71.8  |
| 154 | P84243   | histone H3.3 [OS=Homo sapiens]                                                         | ↑ | 58.748 | 43 | 5  | 15.3  | 11.27 | 55.1  | 114.6 | 108.9 | 121.4 |
| 155 | P16989-1 | Y-box-binding protein 3 [OS=Homo sapiens]                                              | ↑ | 58.506 | 16 | 5  | 40.1  | 9.77  | 73.9  | 114.1 | 96.2  | 115.8 |
| 156 | Q9Y678   | Coatamer subunit gamma-1 [OS=Homo sapiens]                                             | ↓ | 58.494 | 19 | 12 | 97.7  | 5.47  | 124.7 | 94.5  | 102.3 | 78.5  |
| 157 | Q86V81   | THO complex subunit 4 [OS=Homo sapiens]                                                | ↑ | 57.414 | 31 | 4  | 26.9  | 11.15 | 49.6  | 104.6 | 114.1 | 131.6 |
| 158 | P46782   | 40S ribosomal protein S5 [OS=Homo sapiens]                                             | ↓ | 56.426 | 42 | 6  | 22.9  | 9.72  | 122.1 | 108.8 | 92.6  | 76.5  |
| 159 | P13533   | myosin-6 [OS=Homo sapiens]                                                             | ↑ | 56.386 | 6  | 10 | 223.6 | 5.73  | 38.6  | 237   | 124.4 |       |
| 160 | Q13087   | Protein disulfide-isomerase A2 [OS=Homo sapiens]                                       | ↓ | 56.368 | 21 | 8  | 58.2  | 4.98  | 202.2 | 66.1  | 74.4  | 57.3  |
| 161 | Q9Y281-1 | Cofilin-2 [OS=Homo sapiens]                                                            | ↑ | 56.189 | 31 | 5  | 18.7  | 7.88  | 73.4  | 168   | 82.7  | 75.9  |
| 162 | Q15366-1 | Poly(rC)-binding protein 2 [OS=Homo sapiens]                                           | ↓ | 54.909 | 25 | 7  | 38.6  | 6.79  | 138.2 | 90    | 93.9  | 77.9  |
| 163 | Q9UJ21   | Stomatin-like protein 2, mitochondrial [OS=Homo sapiens]                               | ↓ | 54.893 | 43 | 9  | 38.5  | 7.39  | 142   | 82    | 87.9  | 88.1  |
| 164 | Q02790   | Peptidyl-prolyl cis-trans isomerase FKBP4 [OS=Homo sapiens]                            | ↓ | 54.729 | 31 | 10 | 51.8  | 5.43  | 143.7 | 83    | 94.8  | 78.4  |
| 165 | P45880   | Voltage-dependent anion-selective channel protein 2 [OS=Homo sapiens]                  | ↓ | 53.53  | 30 | 7  | 31.5  | 7.56  | 152.2 | 95.8  | 91.6  | 60.4  |
| 166 | Q8WXF1   | Paraspeckle component 1 [OS=Homo sapiens]                                              | ↓ | 53.296 | 14 | 6  | 58.7  | 6.67  | 131.1 | 90.3  | 97.8  | 80.9  |
| 167 | P63010-1 | AP-2 complex subunit beta [OS=Homo sapiens]                                            | ↓ | 52.998 | 12 | 8  | 104.5 | 5.38  | 138.3 | 93.3  | 96.5  | 71.9  |
| 168 | Q06210-1 | glutamine--fructose-6-phosphate aminotransferase [isomerizing] 1 [OS=Homo sapiens]     | ↓ | 52.865 | 19 | 9  | 78.8  | 7.11  | 127.8 | 97    | 98.2  | 77    |
| 169 | P34896-1 | Serine hydroxymethyltransferase, cytosolic [OS=Homo sapiens]                           | ↑ | 52.75  | 24 | 7  | 53    | 7.71  | 66.4  | 88.1  | 134.5 | 111.1 |
| 170 | P50995   | annexin A11 [OS=Homo sapiens]                                                          | ↓ | 52.05  | 21 | 9  | 54.4  | 7.65  | 138.3 | 84.6  | 96.1  | 81.1  |
| 171 | Q75489   | NADH dehydrogenase [ubiquinone] iron-sulfur protein 3, mitochondrial [OS=Homo sapiens] | ↓ | 51.948 | 31 | 7  | 30.2  | 7.5   | 157   | 77.2  | 89.7  | 76    |
| 172 | P62314   | Small nuclear ribonucleoprotein Sm D1 [OS=Homo sapiens]                                | ↑ | 51.739 | 55 | 5  | 13.3  | 11.56 | 44.5  | 103.1 | 122.7 | 129.6 |
| 173 | P01008   | Antithrombin-III [OS=Homo sapiens]                                                     | ↑ | 50.61  | 18 | 8  | 52.6  | 6.71  | 74.6  | 141.1 | 83.4  | 100.9 |
| 174 | P62081   | 40S ribosomal protein S7 [OS=Homo sapiens]                                             | ↓ | 50.283 | 52 | 7  | 22.1  | 10.1  | 135.5 | 91.5  | 97.1  | 75.9  |
| 175 | P56537-1 | eukaryotic translation initiation factor 6 [OS=Homo sapiens]                           | ↓ | 50.067 | 40 | 6  | 26.6  | 4.68  | 136.3 | 90.1  | 89.1  | 84.5  |
| 176 | P11217   | Glycogen phosphorylase, muscle form [OS=Homo sapiens]                                  | ↓ | 49.861 | 20 | 14 | 97    | 7.03  | 76.1  | 23.6  | 269.9 | 30.4  |
| 177 | Q9Y230   | RuvB-like 2 [OS=Homo sapiens]                                                          | ↓ | 49.224 | 23 | 9  | 51.1  | 5.64  | 160.9 | 75.6  | 92    | 71.5  |
| 178 | P02538   | Keratin, type II cytoskeletal 6A [OS=Homo sapiens]                                     | ↓ | 48.793 | 17 | 10 | 60    | 8     | 93.9  | 58.7  | 183.8 | 63.6  |
| 179 | Q9HC38   | Glyoxalase domain-containing protein 4 [OS=Homo sapiens]                               | ↓ | 48.622 | 39 | 11 | 34.8  | 5.6   | 144.4 | 90.9  | 88.6  | 76    |
| 180 | Q14195-1 | Dihydropyrimidinase-related protein 3 [OS=Homo sapiens]                                | ↑ | 48.6   | 13 | 5  | 61.9  | 6.49  | 53.5  | 176.4 | 75.9  | 94.2  |
| 181 | P38606   | V-type proton ATPase catalytic subunit A [OS=Homo sapiens]                             | ↓ | 48.443 | 16 | 8  | 68.3  | 5.52  | 124.4 | 100.6 | 97.1  | 77.8  |
| 182 | O95336   | 6-phosphogluconolactonase [OS=Homo sapiens]                                            | ↓ | 48.282 | 55 | 7  | 27.5  | 6.05  | 163.4 | 77.6  | 81.5  | 77.6  |
| 183 | P13797   | Plastin-3 [OS=Homo sapiens]                                                            | ↓ | 47.946 | 18 | 9  | 70.8  | 5.6   | 123.8 | 102.4 | 98.1  | 75.6  |
| 184 | P01892   | HLA class I histocompatibility antigen, A-2 alpha chain [OS=Homo sapiens]              | ↓ | 47.94  | 25 | 6  | 40.9  | 6.99  | 166.5 | 73    | 92.3  | 68.2  |
| 185 | O60271   | C-jun-amino-terminal kinase-interacting protein 4 [OS=Homo sapiens]                    | ↓ | 47.775 | 10 | 9  | 146.1 | 5.15  | 143.2 | 69.5  | 101   | 86.3  |
| 186 | P16401   | Histone H1.5 [OS=Homo sapiens]                                                         | ↑ | 47.701 | 22 | 6  | 22.6  | 10.92 | 16.1  | 108.8 | 113.7 | 161.4 |
| 187 | P62191   | 26S proteasome regulatory subunit 4 [OS=Homo sapiens]                                  | ↓ | 47.501 | 19 | 6  | 49.2  | 6.21  | 136.1 | 83.7  | 102.6 | 77.7  |
| 188 | P41250   | Glycine--tRNA ligase [OS=Homo sapiens]                                                 | ↓ | 47.31  | 13 | 7  | 83.1  | 7.03  | 116.9 | 112.8 | 104.8 | 65.6  |

|     |          |                                                                                 |   |        |    |   |       |       |       |       |       |       |
|-----|----------|---------------------------------------------------------------------------------|---|--------|----|---|-------|-------|-------|-------|-------|-------|
| 189 | O14744   | Protein arginine N-methyltransferase 5 [OS=Homo sapiens]                        | ↑ | 46.849 | 22 | 9 | 72.6  | 6.29  | 67    | 88    | 121.3 | 123.7 |
| 190 | Q9NTK5-1 | obg-like ATPase 1 [OS=Homo sapiens]                                             | ↓ | 46.837 | 19 | 6 | 44.7  | 7.81  | 155.1 | 79.2  | 93.4  | 72.3  |
| 191 | P04179   | Superoxide dismutase [Mn], mitochondrial [OS=Homo sapiens]                      | ↓ | 46.484 | 27 | 6 | 24.7  | 8.25  | 129.1 | 99    | 90    | 81.8  |
| 192 | P98179   | RNA-binding protein 3 [OS=Homo sapiens]                                         | ↑ | 46.463 | 41 | 3 | 17.2  | 8.91  | 66    | 102   | 101.1 | 130.9 |
| 193 | Q9UNM6   | 26S proteasome non-ATPase regulatory subunit 13 [OS=Homo sapiens]               | ↓ | 46.405 | 23 | 7 | 42.9  | 5.81  | 142.2 | 103.1 | 94    | 60.7  |
| 194 | P21291   | Cysteine and glycine-rich protein 1 [OS=Homo sapiens]                           | ↑ | 46.298 | 42 | 6 | 20.6  | 8.57  | 75.9  | 119   | 98.4  | 106.7 |
| 195 | P13796   | Plastin-2 [OS=Homo sapiens]                                                     | ↓ | 46.243 | 20 | 9 | 70.2  | 5.43  | 150.5 | 82.9  | 97.3  | 69.3  |
| 196 | P18085   | ADP-ribosylation factor 4 [OS=Homo sapiens]                                     | ↓ | 46.108 | 41 | 6 | 20.5  | 7.14  | 128.7 | 94.8  | 101.8 | 74.7  |
| 197 | O95834   | echinoderm microtubule-associated protein-like 2 [OS=Homo sapiens]              | ↓ | 45.257 | 13 | 6 | 70.6  | 6.32  | 105   | 84.4  | 116.5 | 94.1  |
| 198 | P50914   | 60S ribosomal protein L14 [OS=Homo sapiens]                                     | ↑ | 45.018 | 27 | 5 | 23.4  | 10.93 | 49.3  | 107   | 116.2 | 127.5 |
| 199 | P18754-1 | Regulator of chromosome condensation [OS=Homo sapiens]                          | ↓ | 44.927 | 15 | 5 | 44.9  | 7.52  | 127.6 | 91.3  | 109.3 | 71.7  |
| 200 | Q8IUE6   | Histone H2A type 2-B [OS=Homo sapiens]                                          | ↑ | 44.918 | 58 | 5 | 14    | 10.89 | 69.7  | 98.8  | 98.1  | 133.4 |
| 201 | Q9Y310   | tRNA-splicing ligase RtcB homolog [OS=Homo sapiens]                             | ↓ | 44.786 | 20 | 6 | 55.2  | 7.23  | 147.8 | 79.9  | 88.3  | 83.9  |
| 202 | Q13148-1 | TAR DNA-binding protein 43 [OS=Homo sapiens]                                    | ↓ | 44.675 | 27 | 6 | 44.7  | 6.19  | 135.2 | 95.1  | 90.4  | 79.3  |
| 203 | P09382   | Galectin-1 [OS=Homo sapiens]                                                    | ↑ | 44.592 | 64 | 6 | 14.7  | 5.5   | 85.9  | 137   | 81.6  | 95.5  |
| 204 | P29966   | Myristoylated alanine-rich C-kinase substrate [OS=Homo sapiens]                 | ↓ | 43.738 | 30 | 4 | 31.5  | 4.45  | 117.4 | 73.9  | 97    | 111.7 |
| 205 | Q9UMS4   | Pre-mRNA-processing factor 19 [OS=Homo sapiens]                                 | ↓ | 42.578 | 18 | 7 | 55.1  | 6.61  | 125.6 | 89.1  | 110.9 | 74.4  |
| 206 | P62195-1 | 26S proteasome regulatory subunit 8 [OS=Homo sapiens]                           | ↓ | 41.605 | 24 | 7 | 45.6  | 7.55  | 136.6 | 84.5  | 103.4 | 75.5  |
| 207 | Q14152   | Eukaryotic translation initiation factor 3 subunit A [OS=Homo sapiens]          | ↓ | 41.193 | 9  | 9 | 166.5 | 6.79  | 149.1 | 76.8  | 105.4 | 68.7  |
| 208 | Q13409-1 | cytoplasmic dynein 1 intermediate chain 2 [OS=Homo sapiens]                     | ↓ | 41.002 | 15 | 5 | 71.4  | 5.2   | 141.1 | 99.2  | 90.7  | 69    |
| 209 | P17655-1 | Calpain-2 catalytic subunit [OS=Homo sapiens]                                   | ↓ | 41     | 15 | 7 | 79.9  | 4.98  | 143.7 | 83.4  | 96.2  | 76.6  |
| 210 | P54578   | Ubiquitin carboxyl-terminal hydrolase 14 [OS=Homo sapiens]                      | ↓ | 40.578 | 20 | 7 | 56    | 5.3   | 152.5 | 88.6  | 93.7  | 65.3  |
| 211 | P61353   | 60S ribosomal protein L27 [OS=Homo sapiens]                                     | ↑ | 40.42  | 38 | 5 | 15.8  | 10.56 | 32.3  | 111.1 | 127.1 | 129.5 |
| 212 | Q15459   | splicing factor 3A subunit 1 [OS=Homo sapiens]                                  | ↓ | 40.331 | 15 | 9 | 88.8  | 5.22  | 145.7 | 83.1  | 92.3  | 78.9  |
| 213 | P09661   | U2 small nuclear ribonucleoprotein A' [OS=Homo sapiens]                         | ↓ | 39.747 | 44 | 6 | 28.4  | 8.62  | 129.7 | 93.8  | 93.1  | 83.4  |
| 214 | P0CG39   | POTE ankyrin domain family member J [OS=Homo sapiens]                           | ↓ | 39.694 | 8  | 5 | 117.3 | 5.97  | 126.2 | 102.7 | 90.5  | 80.6  |
| 215 | Q16718   | NADH dehydrogenase [ubiquinone] 1 alpha subcomplex subunit 5 [OS=Homo sapiens]  | ↓ | 39.49  | 39 | 4 | 13.5  | 5.99  | 137.5 | 82.8  | 101   | 78.7  |
| 216 | O43252   | bifunctional 3'-phosphoadenosine 5'-phosphosulfate synthase 1 [OS=Homo sapiens] | ↓ | 39.389 | 16 | 7 | 70.8  | 6.86  | 168.1 | 85.9  | 84.6  | 61.3  |
| 217 | Q16658   | Fascin [OS=Homo sapiens]                                                        | ↑ | 39.125 | 19 | 5 | 54.5  | 7.24  | 56.1  | 153.4 | 77.3  | 113.2 |
| 218 | P17980   | 26S proteasome regulatory subunit 6A [OS=Homo sapiens]                          | ↓ | 39.116 | 27 | 7 | 49.2  | 5.24  | 132.7 | 94.5  | 96.9  | 75.9  |
| 219 | P62917   | 60S ribosomal protein L8 [OS=Homo sapiens]                                      | ↑ | 39.095 | 27 | 7 | 28    | 11.03 | 28.8  | 108.2 | 120   | 143   |
| 220 | Q9H3P7   | Golgi resident protein GCP60 [OS=Homo sapiens]                                  | ↓ | 39.042 | 13 | 5 | 60.6  | 5.06  | 130.3 | 90.9  | 102.5 | 76.4  |
| 221 | Q99832   | T-complex protein 1 subunit eta [OS=Homo sapiens]                               | ↓ | 38.902 | 18 | 7 | 59.3  | 7.65  | 122.4 | 91.8  | 97.4  | 88.3  |
| 222 | Q96AB3   | isochorismatase domain-containing protein 2 [OS=Homo sapiens]                   | ↓ | 38.839 | 59 | 6 | 22.3  | 7.77  | 133.7 | 82.1  | 106.9 | 77.3  |
| 223 | P13489   | Ribonuclease inhibitor [OS=Homo sapiens]                                        | ↓ | 38.702 | 24 | 6 | 49.9  | 4.82  | 168   | 99.1  | 73.9  | 59    |
| 224 | Q13126-1 | S-methyl-5'-thioadenosine phosphorylase [OS=Homo sapiens]                       | ↑ | 38.607 | 34 | 6 | 31.2  | 7.18  | 77.4  | 103.1 | 99.5  | 120   |
| 225 | P14868   | Aspartate--tRNA ligase, cytoplasmic [OS=Homo sapiens]                           | ↓ | 37.951 | 20 | 8 | 57.1  | 6.55  | 130.1 | 87.7  | 101.6 | 80.6  |
| 226 | Q14019   | coactosin-like protein [OS=Homo sapiens]                                        | ↓ | 37.943 | 60 | 7 | 15.9  | 5.67  | 136.8 | 97.7  | 96.1  | 69.4  |
| 227 | P02533   | Keratin, type I cytoskeletal 14 [OS=Homo sapiens]                               | ↓ | 37.79  | 17 | 8 | 51.5  | 5.16  | 99.7  | 86.4  | 136.1 | 77.7  |
| 228 | P09496-2 | Isoform Non-brain of Clathrin light chain A [OS=Homo sapiens]                   | ↑ | 37.443 | 25 | 5 | 23.6  | 4.53  | 64.1  | 82.9  | 83.8  | 169.3 |
| 229 | P51665   | 26S proteasome non-ATPase regulatory subunit 7 [OS=Homo sapiens]                | ↓ | 37.326 | 24 | 5 | 37    | 6.77  | 131.7 | 106   | 89.1  | 73.3  |
| 230 | P18465   | HLA class I histocompatibility antigen, B-57 alpha chain [OS=Homo sapiens]      | ↓ | 37.063 | 18 | 5 | 40.2  | 6.3   | 141.6 | 86.5  | 97.3  | 74.6  |
| 231 | Q9BR76   | Coronin-1B [OS=Homo sapiens]                                                    | ↓ | 37.004 | 26 | 7 | 54.2  | 5.88  | 146.7 | 99.7  | 89.2  | 64.3  |
| 232 | Q9UKM9-1 | RNA-binding protein Raly [OS=Homo sapiens]                                      | ↓ | 36.863 | 25 | 7 | 32.4  | 9.17  | 129.3 | 76.9  | 118.5 | 75.3  |
| 233 | P42224-1 | Signal transducer and activator of transcription 1-alpha/beta [OS=Homo sapiens] | ↓ | 36.8   | 11 | 7 | 87.3  | 6.05  | 141.3 | 99.6  | 93.1  | 66.1  |
| 234 | Q8NC51-1 | Plasminogen activator inhibitor 1 RNA-binding protein [OS=Homo sapiens]         | ↑ | 36.767 | 17 | 5 | 44.9  | 8.65  | 70.7  | 94.8  | 115.8 | 118.7 |
| 235 | O94979   | Protein transport protein Sec31A [OS=Homo sapiens]                              | ↓ | 36.564 | 8  | 8 | 132.9 | 6.89  | 148.3 | 79.1  | 92.1  | 80.4  |
| 236 | Q8WUM4   | Programmed cell death 6-interacting protein [OS=Homo sapiens]                   | ↓ | 36.4   | 13 | 8 | 96    | 6.52  | 155.6 | 87.3  | 84.1  | 73    |
| 237 | P69905   | Hemoglobin subunit alpha [OS=Homo sapiens]                                      | ↑ | 36.284 | 27 | 5 | 15.2  | 8.68  | 84.8  | 102.3 | 102.3 | 110.2 |
| 238 | O00303   | Eukaryotic translation initiation factor 3 subunit F [OS=Homo sapiens]          | ↓ | 35.945 | 14 | 3 | 37.5  | 5.45  | 159.1 | 84    | 86.6  | 70.4  |
| 239 | P35613   | Basigin [OS=Homo sapiens]                                                       | ↓ | 35.882 | 17 | 5 | 42.2  | 5.66  | 134.3 | 73.7  | 104.1 | 87.8  |
| 240 | P62750   | 60S ribosomal protein L23a [OS=Homo sapiens]                                    | ↑ | 35.834 | 34 | 6 | 17.7  | 10.45 | 56.1  | 116.3 | 113.1 | 114.5 |
| 241 | P31146   | Coronin-1A [OS=Homo sapiens]                                                    | ↓ | 35.59  | 19 | 4 | 51    | 6.68  | 143.8 | 123.4 | 85.6  | 47.2  |
| 242 | P14543-1 | Nidogen-1 [OS=Homo sapiens]                                                     | ↑ | 35.547 | 5  | 5 | 136.3 | 5.29  | 19.4  | 225.2 | 29.6  | 125.8 |
| 243 | P61313-1 | 60S ribosomal protein L15 [OS=Homo sapiens]                                     | ↑ | 35.399 | 30 | 6 | 24.1  | 11.62 | 11.9  | 112.2 | 144.1 | 131.8 |
| 244 | P32322   | Pyrrrole-5-carboxylate reductase 1, mitochondrial [OS=Homo sapiens]             | ↓ | 35.298 | 16 | 3 | 33.3  | 7.61  | 135.4 | 94.9  | 98.9  | 70.8  |
| 245 | Q15102   | Platelet-activating factor acetylhydrolase 1B subunit gamma [OS=Homo sapiens]   | ↓ | 35.276 | 36 | 5 | 25.7  | 6.84  | 145.9 | 87.6  | 90.5  | 76    |
| 246 | P00492   | Hypoxanthine-guanine phosphoribosyltransferase [OS=Homo sapiens]                | ↓ | 35.066 | 34 | 6 | 24.6  | 6.68  | 124.1 | 85.6  | 98.3  | 92    |
| 247 | P61160-1 | Actin-related protein 2 [OS=Homo sapiens]                                       | ↓ | 35.026 | 22 | 5 | 44.7  | 6.74  | 120.3 | 111.6 | 96.9  | 71.2  |
| 248 | P54136-1 | arginine--tRNA ligase, cytoplasmic [OS=Homo sapiens]                            | ↓ | 34.974 | 13 | 7 | 75.3  | 6.68  | 134.9 | 88.1  | 97.2  | 79.9  |
| 249 | Q9BWS9-1 | Chitinase domain-containing protein 1 [OS=Homo sapiens]                         | ↓ | 34.721 | 32 | 7 | 44.9  | 8.63  | 153   | 69    | 120.4 | 57.6  |
| 250 | Q07020   | 60S ribosomal protein L18 [OS=Homo sapiens]                                     | ↑ | 34.658 | 35 | 7 | 21.6  | 11.72 | 15.7  | 122.5 | 119.2 | 142.6 |
| 251 | P49588   | Alanine--tRNA ligase, cytoplasmic [OS=Homo sapiens]                             | ↓ | 34.639 | 8  | 6 | 106.7 | 5.53  | 187.7 | 68.2  | 83.5  | 60.5  |

|     |          |                                                                        |   |        |    |   |       |       |       |       |       |       |
|-----|----------|------------------------------------------------------------------------|---|--------|----|---|-------|-------|-------|-------|-------|-------|
| 252 | P55735-1 | protein SEC13 homolog [OS=Homo sapiens]                                | ↓ | 34.602 | 25 | 5 | 35.5  | 5.48  | 116.9 | 101.1 | 104.9 | 77.1  |
| 253 | Q5JWF2-1 | Guanine nucleotide-binding protein G(S) subunit alpha isoforms XLas [C | ↑ | 34.409 | 8  | 7 | 111   | 5.03  | 85.6  | 132.3 | 80.1  | 102   |
| 254 | P61326   | Protein mago nashi homolog [OS=Homo sapiens]                           | ↓ | 34.378 | 47 | 5 | 17.2  | 6.11  | 128.3 | 114.1 | 100.1 | 57.5  |
| 255 | O60749   | Sorting nexin-2 [OS=Homo sapiens]                                      | ↓ | 34.107 | 12 | 5 | 58.4  | 5.12  | 124.4 | 103.5 | 95.2  | 76.9  |
| 256 | O75643-1 | U5 small nuclear ribonucleoprotein 200 kDa helicase [OS=Homo sapien    | ↓ | 34.07  | 4  | 6 | 244.4 | 6.06  | 140.4 | 88.7  | 89.9  | 81    |
| 257 | Q07960   | rho GTPase-activating protein 1 [OS=Homo sapiens]                      | ↓ | 34.016 | 26 | 6 | 50.4  | 6.29  | 139.9 | 87.5  | 98.7  | 74    |
| 258 | P62753   | 40S RIBOSOMAL PROTEIN S6 [OS=Homo sapiens]                             | ↑ | 33.987 | 19 | 4 | 28.7  | 10.84 | 55.5  | 126   | 116.7 | 101.8 |
| 259 | Q15371   | Eukaryotic translation initiation factor 3 subunit D [OS=Homo sapiens] | ↑ | 33.736 | 15 | 6 | 63.9  | 6.05  | 55.5  | 159.4 | 70.5  | 114.6 |
| 260 | O60664-1 | Perilipin-3 [OS=Homo sapiens]                                          | ↓ | 33.661 | 25 | 5 | 47    | 5.44  | 118.4 | 63.4  | 108.3 | 109.8 |
| 261 | P02675   | Fibrinogen beta chain [OS=Homo sapiens]                                | ↑ | 33.634 | 14 | 6 | 55.9  | 8.27  | 45.9  | 186.9 | 60    | 107.2 |
| 262 | P62277   | 40S ribosomal protein S13 [OS=Homo sapiens]                            | ↑ | 33.524 | 30 | 5 | 17.2  | 10.54 | 50.4  | 123.7 | 111.4 | 114.5 |
| 263 | Q9BUT1-1 | 3-hydroxybutyrate dehydrogenase type 2 [OS=Homo sapiens]               | ↑ | 33.361 | 27 | 5 | 26.7  | 7.65  | 66.4  | 104.8 | 101.3 | 127.4 |
| 264 | Q96FW1   | Ubiquitin thioesterase otub1 [OS=Homo sapiens]                         | ↓ | 33.346 | 27 | 6 | 31.3  | 4.94  | 153.6 | 93    | 85.8  | 67.7  |
| 265 | Q16891   | MICOS complex subunit Mic60 [OS=Homo sapiens]                          | ↓ | 33.319 | 8  | 5 | 83.6  | 6.48  | 160.5 | 81.2  | 91    | 67.4  |
| 266 | P07741-1 | Adenine phosphoribosyltransferase [OS=Homo sapiens]                    | ↓ | 33.243 | 37 | 5 | 19.6  | 6.02  | 162.7 | 80.4  | 89.4  | 67.3  |
| 267 | P47897   | glutamine--tRNA ligase [OS=Homo sapiens]                               | ↓ | 33.218 | 12 | 7 | 87.7  | 7.15  | 180.2 | 78.7  | 88.9  | 52.1  |
| 268 | Q12931   | heat shock protein 75 kDa, mitochondrial [OS=Homo sapiens]             | ↓ | 33.194 | 10 | 5 | 80.1  | 8.21  | 157.8 | 72.9  | 96.2  | 73.1  |
| 269 | Q96A32   | Myosin regulatory light chain 2, skeletal muscle isoform [OS=Homo sap  | ↓ | 32.78  | 41 | 6 | 19    | 5.01  | 130.3 | 148.8 | 168.4 | 52.5  |
| 270 | Q9UHX1-1 | poly(U)-binding-splicing factor PUF60 [OS=Homo sapiens]                | ↓ | 32.777 | 13 | 6 | 59.8  | 5.29  | 133.1 | 89.5  | 99.8  | 77.7  |
| 271 | P83731   | 60S ribosomal protein L24 [OS=Homo sapiens]                            | ↑ | 32.027 | 31 | 5 | 17.8  | 11.25 | 53.9  | 126.6 | 107.7 | 111.8 |
| 272 | P06730   | Eukaryotic translation initiation factor 4E [OS=Homo sapiens]          | ↓ | 31.862 | 21 | 5 | 25.1  | 6.15  | 140.1 | 84.9  | 96.6  | 78.4  |
| 273 | Q14257   | Reticulocalbin-2 [OS=Homo sapiens]                                     | ↑ | 31.755 | 23 | 4 | 36.9  | 4.4   | 87.6  | 99.5  | 95.5  | 117.4 |
| 274 | P62249   | 40S ribosomal protein S16 [OS=Homo sapiens]                            | ↑ | 31.714 | 36 | 6 | 16.4  | 10.21 | 56.2  | 126.3 | 115.4 | 102.1 |
| 275 | Q16851   | UTP--glucose-1-phosphate uridylyltransferase [OS=Homo sapiens]         | ↓ | 31.416 | 18 | 7 | 56.9  | 8.15  | 139.6 | 94.7  | 92.9  | 72.7  |
| 276 | P56192   | Methionine--tRNA ligase, cytoplasmic [OS=Homo sapiens]                 | ↓ | 31.118 | 8  | 6 | 101.1 | 6.16  | 150.9 | 83.1  | 94.4  | 71.6  |
| 277 | P09543-1 | 2',3'-cyclic-nucleotide 3'-phosphodiesterase [OS=Homo sapiens]         | ↓ | 31.016 | 19 | 5 | 47.5  | 9.07  | 122.3 | 102.3 | 93    | 82.4  |
| 278 | Q12959   | Disks large homolog 1 [OS=Homo sapiens]                                | ↓ | 30.908 | 10 | 5 | 100.4 | 5.76  | 111.2 | 101.6 | 87.3  | 99.9  |
| 279 | Q99829   | Copine-1 [OS=Homo sapiens]                                             | ↓ | 30.894 | 15 | 6 | 59    | 5.83  | 144.3 | 69.3  | 109.2 | 77.2  |
| 280 | O00410   | Importin-5 [OS=Homo sapiens]                                           | ↓ | 30.871 | 7  | 5 | 123.6 | 4.94  | 147.7 | 80.4  | 94.2  | 77.8  |
| 281 | Q00577   | Transcriptional activator protein Pur-alpha [OS=Homo sapiens]          | ↓ | 30.615 | 27 | 4 | 34.9  | 6.44  | 153.9 | 61.4  | 109   | 75.6  |
| 282 | P46781   | 40S ribosomal protein S9 [OS=Homo sapiens]                             | ↓ | 30.452 | 37 | 9 | 22.6  | 10.65 | 50.6  | 128.7 | 125.5 | 95.3  |
| 283 | Q94826   | Mitochondrial import receptor subunit TOM70 [OS=Homo sapiens]          | ↓ | 30.354 | 10 | 5 | 67.4  | 7.12  | 135.1 | 82.9  | 97.4  | 84.6  |
| 284 | O60437   | periplakin [OS=Homo sapiens]                                           | ↓ | 30.15  | 4  | 7 | 204.6 | 5.6   | 125.7 | 62.3  | 109.1 | 102.9 |
| 285 | P05023   | Sodium/potassium-transporting ATPase subunit alpha-1 [OS=Homo sap      | ↓ | 30.029 | 7  | 5 | 112.8 | 5.49  | 109.5 | 99.8  | 115.8 | 74.9  |
| 286 | P48444   | Coatomer subunit delta [OS=Homo sapiens]                               | ↓ | 30.026 | 10 | 5 | 57.2  | 6.21  | 132.9 | 102.7 | 92    | 72.3  |
| 287 | Q9NVA2-1 | Septin-11 [OS=Homo sapiens]                                            | ↓ | 29.777 | 11 | 4 | 49.4  | 6.81  | 123.9 | 116   | 91.1  | 69    |
| 288 | Q9Y696   | Chloride intracellular channel protein 4 [OS=Homo sapiens]             | ↓ | 29.606 | 34 | 6 | 28.8  | 5.59  | 120.8 | 101.9 | 96.5  | 80.7  |
| 289 | O60832-1 | H/ACA ribonucleoprotein complex subunit 4 [OS=Homo sapiens]            | ↑ | 29.572 | 13 | 4 | 57.6  | 9.42  | 60.7  | 106.4 | 130.6 | 102.3 |
| 290 | P18621   | 60S ribosomal protein L17 [OS=Homo sapiens]                            | ↑ | 29.432 | 26 | 4 | 21.4  | 10.17 | 53.8  | 108.9 | 115.2 | 122   |
| 291 | P61088   | ubiquitin-conjugating enzyme E2 N [OS=Homo sapiens]                    | ↓ | 29.388 | 48 | 4 | 17.1  | 6.57  | 148.2 | 96.9  | 81.4  | 73.5  |
| 292 | Q9NUJ1   | Mycophenolic acid acyl-glucuronide esterase, mitochondrial [OS=Homo    | ↓ | 28.911 | 15 | 4 | 33.9  | 8.57  | 177.4 | 41.8  | 98.9  | 81.9  |
| 293 | P41252   | isoleucine--tRNA ligase, cytoplasmic [OS=Homo sapiens]                 | ↓ | 28.656 | 6  | 7 | 144.4 | 6.15  | 172.5 | 65.3  | 112.7 | 49.5  |
| 294 | P02787   | Serotransferrin [OS=Homo sapiens]                                      | ↑ | 28.58  | 2  | 2 | 77    | 7.12  | 88.2  | 150.4 | 86.1  | 75.3  |
| 295 | P62873   | Guanine nucleotide-binding protein G(I)/G(S)/G(T) subunit beta-1 [OS=H | ↓ | 28.576 | 19 | 5 | 37.4  | 6     | 137.3 | 93.9  | 92.9  | 75.9  |
| 296 | P62910   | 60S ribosomal protein L32 [OS=Homo sapiens]                            | ↑ | 28.359 | 28 | 3 | 15.9  | 11.33 | 34    | 118.2 | 108.2 | 139.6 |
| 297 | Q02543   | 60S ribosomal protein L18a [OS=Homo sapiens]                           | ↑ | 28.235 | 30 | 5 | 20.7  | 10.71 | 23.9  | 128.2 | 122.6 | 125.3 |
| 298 | Q8TD30-1 | Alanine aminotransferase 2 [OS=Homo sapiens]                           | ↓ | 28.143 | 16 | 5 | 57.9  | 7.71  | 121.9 | 78.3  | 110.5 | 89.3  |
| 299 | P11387   | DNA topoisomerase 1 [OS=Homo sapiens]                                  | ↓ | 28.122 | 12 | 7 | 90.7  | 9.31  | 60.3  | 121.6 | 120.5 | 97.6  |
| 300 | Q15717   | ELAV-like protein 1 [OS=Homo sapiens]                                  | ↓ | 28.101 | 15 | 4 | 36.1  | 9.17  | 135   | 88.9  | 93.6  | 82.6  |
| 301 | Q9Y3F4   | Serine-threonine kinase receptor-associated protein [OS=Homo sapiens]  | ↓ | 27.967 | 24 | 6 | 38.4  | 5.12  | 120.9 | 102.9 | 98    | 78.3  |
| 302 | O00391   | Sulfhydryl oxidase 1 [OS=Homo sapiens]                                 | ↓ | 27.847 | 9  | 5 | 82.5  | 8.92  | 169.1 | 103.3 | 78.4  | 49.2  |
| 303 | P27694   | Replication protein A 70 kDa DNA-binding subunit [OS=Homo sapiens]     | ↓ | 27.431 | 12 | 4 | 68.1  | 7.21  | 125.8 | 89.2  | 103.2 | 81.8  |
| 304 | O43813   | LanC-like protein 1 [OS=Homo sapiens]                                  | ↑ | 27.166 | 16 | 5 | 45.3  | 7.75  | 70.4  | 90.8  | 110.1 | 128.7 |
| 305 | Q9UJ7-1  | GTP:AMP phosphotransferase AK3, mitochondrial [OS=Homo sapiens]        | ↓ | 27.159 | 23 | 4 | 25.6  | 9.16  | 140.3 | 91.8  | 89.9  | 78    |
| 306 | P51148   | Ras-related protein Rab-5C [OS=Homo sapiens]                           | ↓ | 27.134 | 22 | 4 | 23.5  | 8.41  | 122.1 | 110.1 | 93.5  | 74.3  |
| 307 | Q9UHD8-1 | Septin-9 [OS=Homo sapiens]                                             | ↓ | 27.123 | 10 | 5 | 65.4  | 8.97  | 136.5 | 95.6  | 97.5  | 70.4  |
| 308 | P32969   | 60S ribosomal protein L9 [OS=Homo sapiens]                             | ↓ | 26.537 | 31 | 3 | 21.9  | 9.95  | 117.7 | 100.3 | 105.3 | 76.7  |
| 309 | P62280   | 40S ribosomal protein S11 [OS=Homo sapiens]                            | ↑ | 26.452 | 35 | 5 | 18.4  | 10.3  | 70.3  | 108.9 | 124.1 | 96.7  |
| 310 | Q08945   | FACT complex subunit SSRP1 [OS=Homo sapiens]                           | ↓ | 26.392 | 8  | 4 | 81    | 6.87  | 139   | 101.2 | 90.4  | 69.4  |
| 311 | P05976-1 | Myosin light chain 1/3, skeletal muscle isoform [OS=Homo sapiens]      | ↓ | 26.264 | 21 | 5 | 21.1  | 5.03  | 108   | 45.3  | 236.8 | 10    |
| 312 | P62851   | 40S ribosomal protein S25 [OS=Homo sapiens]                            | ↑ | 26.225 | 30 | 5 | 13.7  | 10.11 | 63.6  | 103.7 | 99.8  | 132.9 |
| 313 | P46778   | 60S ribosomal protein L21 [OS=Homo sapiens]                            | ↑ | 26.205 | 21 | 3 | 18.6  | 10.49 | 37.9  | 113.6 | 125.6 | 122.9 |
| 314 | P42126   | Enoyl-CoA delta isomerase 1, mitochondrial [OS=Homo sapiens]           | ↓ | 26.017 | 17 | 4 | 32.8  | 8.54  | 147.4 | 76    | 94.1  | 82.5  |

|     |          |                                                                                                |   |        |    |   |       |       |       |       |       |       |
|-----|----------|------------------------------------------------------------------------------------------------|---|--------|----|---|-------|-------|-------|-------|-------|-------|
| 315 | Q5SSJ5-1 | Heterochromatin protein 1-binding protein 3 [OS=Homo sapiens]                                  | ↑ | 25.908 | 10 | 5 | 61.2  | 9.67  | 45.7  | 108.7 | 137.5 | 108.1 |
| 316 | P35998   | 26S proteasome regulatory subunit 7 [OS=Homo sapiens]                                          | ↓ | 25.881 | 11 | 4 | 48.6  | 5.95  | 163.1 | 79.7  | 89.6  | 67.7  |
| 317 | P62333   | 26S proteasome regulatory subunit 10B [OS=Homo sapiens]                                        | ↓ | 25.677 | 13 | 4 | 44.1  | 7.49  | 151.1 | 82.9  | 91.3  | 74.6  |
| 318 | Q96RQ3   | Methylcrotonoyl-CoA carboxylase subunit alpha, mitochondrial [OS=Homo sapiens]                 | ↓ | 25.58  | 7  | 4 | 80.4  | 7.78  | 134.6 | 65.1  | 110.8 | 89.6  |
| 319 | O60763-1 | General vesicular transport factor p115 [OS=Homo sapiens]                                      | ↓ | 25.358 | 6  | 5 | 107.8 | 4.91  | 130.9 | 84.5  | 97.4  | 87.3  |
| 320 | Q96C86   | M7GpppX diphosphatase [OS=Homo sapiens]                                                        | ↓ | 25.329 | 19 | 4 | 38.6  | 6.38  | 144.4 | 97.8  | 90.5  | 67.2  |
| 321 | O15145   | Actin-related protein 2/3 complex subunit 3 [OS=Homo sapiens]                                  | ↓ | 25.119 | 28 | 5 | 20.5  | 8.59  | 123.9 | 98.9  | 96.9  | 80.4  |
| 322 | Q7L2H7   | Eukaryotic translation initiation factor 3 subunit M [OS=Homo sapiens]                         | ↓ | 24.91  | 24 | 5 | 42.5  | 5.63  | 167.6 | 79.5  | 83.8  | 69.2  |
| 323 | O94874-1 | E3 UFM1-protein ligase 1 [OS=Homo sapiens]                                                     | ↓ | 24.812 | 7  | 4 | 89.5  | 6.79  | 150.2 | 86.4  | 109.5 | 53.9  |
| 324 | O00629   | Importin subunit alpha-3 [OS=Homo sapiens]                                                     | ↓ | 24.792 | 11 | 3 | 57.9  | 4.96  | 136.2 | 102.8 | 93.1  | 67.9  |
| 325 | Q9HC35   | Echinoderm microtubule-associated protein-like 4 [OS=Homo sapiens]                             | ↓ | 24.753 | 6  | 5 | 108.8 | 6.4   | 117.4 | 100.3 | 105.5 | 76.8  |
| 326 | P54725-1 | UV excision repair protein RAD23 homolog A [OS=Homo sapiens]                                   | ↓ | 24.731 | 21 | 4 | 39.6  | 4.58  | 132.1 | 115.1 | 86.2  | 66.6  |
| 327 | P09327   | Villin-1 [OS=Homo sapiens]                                                                     | ↓ | 24.685 | 10 | 5 | 92.6  | 6.39  | 144.9 | 68.1  | 106.1 | 80.9  |
| 328 | P59998   | Actin-related protein 2/3 complex subunit 4 [OS=Homo sapiens]                                  | ↓ | 24.667 | 36 | 5 | 19.7  | 8.43  | 111.3 | 112.2 | 104.3 | 72.2  |
| 329 | Q5R314   | tetratricopeptide repeat protein 38 [OS=Homo sapiens]                                          | ↓ | 24.649 | 12 | 5 | 52.8  | 5.99  | 126.4 | 88    | 115.5 | 70.2  |
| 330 | O96008   | Mitochondrial import receptor subunit TOM40 homolog [OS=Homo sapiens]                          | ↓ | 24.331 | 12 | 3 | 37.9  | 7.25  | 155.3 | 96.4  | 107.6 | 40.6  |
| 331 | Q07157   | Tight junction protein ZO-1 [OS=Homo sapiens]                                                  | ↓ | 24.326 | 3  | 4 | 195.3 | 6.7   | 146   | 93.3  | 90    | 70.7  |
| 332 | P20674   | Cytochrome c oxidase subunit 5A, mitochondrial [OS=Homo sapiens]                               | ↓ | 24.322 | 47 | 5 | 16.8  | 6.79  | 167.2 | 65.3  | 103   | 64.4  |
| 333 | P56470   | galectin-4 [OS=Homo sapiens]                                                                   | ↓ | 24.294 | 20 | 4 | 35.9  | 9.16  | 131.5 | 108.7 | 88.7  | 71.2  |
| 334 | P07305   | Histone H1.0 [OS=Homo sapiens]                                                                 | ↑ | 24.268 | 21 | 4 | 20.9  | 10.84 | 18.2  | 104.6 | 117.7 | 159.4 |
| 335 | Q8WW12   | PEST proteolytic signal-containing nuclear protein [OS=Homo sapiens]                           | ↓ | 24.215 | 15 | 2 | 18.9  | 7.49  | 123.5 | 100.4 | 92.2  | 83.9  |
| 336 | P07451   | carbonic anhydrase 3 [OS=Homo sapiens]                                                         | ↓ | 24.066 | 17 | 3 | 29.5  | 7.34  | 52.8  | 40.8  | 274.8 | 31.6  |
| 337 | P67870   | Casein kinase II subunit beta [OS=Homo sapiens]                                                | ↓ | 23.86  | 27 | 4 | 24.9  | 5.55  | 114.4 | 106.4 | 76    | 103.1 |
| 338 | P78527   | DNA-dependent protein kinase catalytic subunit [OS=Homo sapiens]                               | ↓ | 23.796 | 1  | 5 | 468.8 | 7.12  | 98.7  | 82.4  | 135.2 | 83.8  |
| 339 | P00450   | Ceruloplasmin [OS=Homo sapiens]                                                                | ↑ | 23.73  | 6  | 4 | 122.1 | 5.72  | 0.6   | 201.8 | 57.1  | 140.4 |
| 340 | O95299   | NADH dehydrogenase [ubiquinone] 1 alpha subcomplex subunit 10, mitochondrial [OS=Homo sapiens] | ↓ | 23.442 | 19 | 4 | 40.7  | 8.48  | 143.2 | 77.5  | 98.8  | 80.5  |
| 341 | Q9NR45   | sialic acid synthase [OS=Homo sapiens]                                                         | ↓ | 22.979 | 8  | 2 | 40.3  | 6.74  | 152.5 | 97.7  | 92.8  | 57    |
| 342 | Q9HB71   | Calcylin-binding protein [OS=Homo sapiens]                                                     | ↓ | 22.966 | 14 | 2 | 26.2  | 8.25  | 129.2 | 87.1  | 101.5 | 82.2  |
| 343 | P02679   | Fibrinogen gamma chain [OS=Homo sapiens]                                                       | ↑ | 22.923 | 9  | 3 | 51.5  | 5.62  | 66.2  | 167.5 | 63.6  | 102.7 |
| 344 | O00754   | Lysosomal alpha-mannosidase [OS=Homo sapiens]                                                  | ↑ | 22.829 | 4  | 3 | 113.7 | 7.28  | 43.2  | 120.4 | 119.5 | 116.8 |
| 345 | O43583   | density-regulated protein [OS=Homo sapiens]                                                    | ↑ | 22.713 | 26 | 4 | 22.1  | 5.3   | 76.5  | 91.8  | 121   | 110.7 |
| 346 | P42025   | Beta-centractin [OS=Homo sapiens]                                                              | ↑ | 22.679 | 21 | 4 | 42.3  | 6.4   | 4.8   | 250.7 | 68.3  | 76.3  |
| 347 | P35611-1 | Alpha-adducin [OS=Homo sapiens]                                                                | ↑ | 22.647 | 8  | 3 | 80.9  | 5.83  | 113.3 | 151.7 | 11.9  | 123.1 |
| 348 | P45378-1 | Troponin T, fast skeletal muscle [OS=Homo sapiens]                                             | ↑ | 22.611 | 19 | 4 | 31.8  | 5.9   | 3.5   | 255.8 | 124.5 | 16.2  |
| 349 | Q8N857   | Protein enabled homolog [OS=Homo sapiens]                                                      | ↓ | 22.524 | 9  | 5 | 66.5  | 6.93  | 108.1 | 70.4  | 115.9 | 105.5 |
| 350 | Q9BY43   | Charged multivesicular body protein 4a [OS=Homo sapiens]                                       | ↑ | 22.434 | 23 | 4 | 25.1  | 4.7   | 62.1  | 87.2  | 106.9 | 143.7 |
| 351 | Q9Y266   | nuclear migration protein nudC [OS=Homo sapiens]                                               | ↓ | 22.38  | 17 | 5 | 38.2  | 5.38  | 133.7 | 87.9  | 98.9  | 79.6  |
| 352 | Q9H9B4   | Sideroflexin-1 [OS=Homo sapiens]                                                               | ↓ | 22.357 | 18 | 3 | 35.6  | 9.07  | 136.1 | 89.7  | 92.8  | 81.4  |
| 353 | Q04446   | 1,4-alpha-glucan-branching enzyme [OS=Homo sapiens]                                            | ↑ | 22.243 | 11 | 5 | 80.4  | 6.32  | 45    | 102.3 | 125.1 | 127.6 |
| 354 | P17661   | desmin [OS=Homo sapiens]                                                                       | ↑ | 22.018 | 8  | 5 | 53.5  | 5.27  | 88.6  | 94    | 123.7 | 93.8  |
| 355 | O60884   | DnaJ homolog subfamily A member 2 [OS=Homo sapiens]                                            | ↑ | 22.001 | 17 | 3 | 45.7  | 6.48  | 40.5  | 163.7 | 39.4  | 156.4 |
| 356 | Q9Y365   | START domain-containing protein 10 [OS=Homo sapiens]                                           | ↓ | 21.887 | 14 | 3 | 33    | 7.12  | 170.9 | 74.5  | 98.7  | 55.9  |
| 357 | Q13308-1 | Inactive tyrosine-protein kinase 7 [OS=Homo sapiens]                                           | ↓ | 21.731 | 5  | 4 | 118.3 | 7.09  | 131.7 | 85.7  | 97.2  | 85.5  |
| 358 | P13861   | cAMP-dependent protein kinase type II-alpha regulatory subunit [OS=Homo sapiens]               | ↓ | 21.638 | 11 | 3 | 45.5  | 5.07  | 189.1 | 18.1  | 107.4 | 85.4  |
| 359 | O95433   | activator of 90 kDa heat shock protein ATPase homolog 1 [OS=Homo sapiens]                      | ↓ | 21.613 | 13 | 3 | 38.3  | 5.53  | 160   | 73.5  | 99.5  | 67.1  |
| 360 | P06454-1 | Prothymosin alpha [OS=Homo sapiens]                                                            | ↑ | 21.547 | 22 | 3 | 12.2  | 3.78  | 79    | 111.5 | 126   | 83.5  |
| 361 | P11908   | ribose-phosphate pyrophosphokinase 2 [OS=Homo sapiens]                                         | ↓ | 21.529 | 19 | 4 | 34.7  | 6.61  | 180.4 | 113.3 | 78    | 28.4  |
| 362 | P08134   | Rho-related GTP-binding protein RhoC [OS=Homo sapiens]                                         | ↓ | 21.414 | 25 | 4 | 22    | 6.58  | 131.5 | 104.7 | 88.7  | 75.1  |
| 363 | P61586   | Transforming protein RhoA [OS=Homo sapiens]                                                    | ↓ | 21.297 | 25 | 4 | 21.8  | 6.1   | 128.1 | 106.2 | 87.2  | 78.5  |
| 364 | Q9P2M7-1 | cingulin [OS=Homo sapiens]                                                                     | ↓ | 21.156 | 6  | 5 | 136.3 | 5.54  | 120.6 | 82.5  | 104.2 | 92.8  |
| 365 | Q9Y314   | nitric oxide synthase-interacting protein [OS=Homo sapiens]                                    | ↑ | 21.142 | 20 | 4 | 33.2  | 8.82  | 67.7  | 73.2  | 94.8  | 164.4 |
| 366 | P42766   | 60S ribosomal protein L35 [OS=Homo sapiens]                                                    | ↑ | 21.062 | 26 | 3 | 14.5  | 11.05 | 31.7  | 96.4  | 122.5 | 149.4 |
| 367 | P51571   | translocon-associated protein subunit delta [OS=Homo sapiens]                                  | ↓ | 20.926 | 25 | 3 | 19    | 6.15  | 131.3 | 95.1  | 101.3 | 72.4  |
| 368 | O43488   | aflatoxin B1 aldehyde reductase member 2 [OS=Homo sapiens]                                     | ↓ | 20.773 | 13 | 3 | 39.6  | 7.17  | 159.5 | 76    | 90.5  | 74    |
| 369 | P22102-1 | trifunctional purine biosynthetic protein adenosine-3 [OS=Homo sapiens]                        | ↓ | 20.719 | 8  | 5 | 107.7 | 6.7   | 160.6 | 60.3  | 134.9 | 44.2  |
| 370 | Q8N163-1 | Cell cycle and apoptosis regulator protein 2 [OS=Homo sapiens]                                 | ↓ | 20.548 | 7  | 4 | 102.8 | 5.22  | 171.9 | 86.7  | 88    | 53.4  |
| 371 | Q15257-1 | Serine/threonine-protein phosphatase 2A activator [OS=Homo sapiens]                            | ↓ | 20.524 | 17 | 3 | 40.6  | 5.94  | 131.5 | 92.2  | 95.6  | 80.7  |
| 372 | Q14498-1 | RNA-binding protein 39 [OS=Homo sapiens]                                                       | ↓ | 20.455 | 10 | 4 | 59.3  | 10.1  | 148.8 | 80.4  | 93.4  | 77.4  |
| 373 | P30711   | Glutathione S-transferase theta-1 [OS=Homo sapiens]                                            | ↓ | 20.271 | 19 | 3 | 27.3  | 7.49  | 144.2 | 80.8  | 97.1  | 77.9  |
| 374 | P51608   | Methyl-CpG-binding protein 2 [OS=Homo sapiens]                                                 | ↑ | 20.222 | 7  | 2 | 52.4  | 9.95  | 59.6  | 116.2 | 97.1  | 127   |
| 375 | Q9Y3U8   | 60S ribosomal protein L36 [OS=Homo sapiens]                                                    | ↑ | 20.21  | 30 | 4 | 12.2  | 11.59 | 35.9  | 118.8 | 120.2 | 125   |
| 376 | P12081   | Histidine-tRNA ligase, cytoplasmic [OS=Homo sapiens]                                           | ↓ | 20.133 | 8  | 4 | 57.4  | 5.88  | 137.1 | 98.2  | 98.5  | 66.3  |
| 377 | Q13642-1 | Isoform 1 of Four and a half LIM domains protein 1 [OS=Homo sapiens]                           | ↑ | 20.042 | 21 | 5 | 31.9  | 8.32  | 87.1  | 55.7  | 199.9 | 57.3  |

|     |          |                                                                                              |   |        |    |   |       |       |       |       |       |       |
|-----|----------|----------------------------------------------------------------------------------------------|---|--------|----|---|-------|-------|-------|-------|-------|-------|
| 378 | O00584   | Ribonuclease T2 [OS=Homo sapiens]                                                            | ↑ | 20.021 | 23 | 4 | 29.5  | 7.08  | 61.9  | 104.5 | 119.6 | 114.1 |
| 379 | P54802   | alpha-N-acetylglucosaminidase [OS=Homo sapiens]                                              | ↑ | 20.017 | 11 | 5 | 82.2  | 6.65  | 74.4  | 115.7 | 101.6 | 108.4 |
| 380 | Q96EK6   | glucosamine 6-phosphate N-acetyltransferase [OS=Homo sapiens]                                | ↓ | 19.976 | 33 | 3 | 20.7  | 7.99  | 135.1 | 109.3 | 90.9  | 64.7  |
| 381 | Q9NUQ9   | protein FAM49B [OS=Homo sapiens]                                                             | ↓ | 19.852 | 13 | 3 | 36.7  | 6.06  | 130.3 | 97.9  | 97.7  | 74.1  |
| 382 | P63173   | 60S ribosomal protein l38 [OS=Homo sapiens]                                                  | ↓ | 19.826 | 36 | 3 | 8.2   | 10.1  | 126.7 | 81.5  | 104.9 | 86.8  |
| 383 | Q95479   | GDH/6PGL endoplasmic bifunctional protein [OS=Homo sapiens]                                  | ↓ | 19.675 | 5  | 3 | 88.8  | 7.3   | 143.9 | 82.9  | 99.6  | 73.6  |
| 384 | P26373-1 | 60S ribosomal protein L13 [OS=Homo sapiens]                                                  | ↑ | 19.421 | 25 | 5 | 24.2  | 11.65 | 30.6  | 134.9 | 123.8 | 110.7 |
| 385 | P04083   | annexin A1 [OS=Homo sapiens]                                                                 | ↑ | 19.279 | 9  | 3 | 38.7  | 7.02  | 64.8  | 159.9 | 86.9  | 88.3  |
| 386 | P23381   | Tryptophan--tRNA ligase, cytoplasmic [OS=Homo sapiens]                                       | ↓ | 19.219 | 9  | 3 | 53.1  | 6.23  | 162.3 | 83.5  | 86    | 68.3  |
| 387 | Q9UHB6   | LIM domain and actin-binding protein 1 [OS=Homo sapiens]                                     | ↓ | 19.208 | 6  | 3 | 85.2  | 6.84  | 164.6 | 51.7  | 103.3 | 80.5  |
| 388 | P24821   | Tenascin [OS=Homo sapiens]                                                                   | ↑ | 19.055 | 2  | 4 | 240.7 | 4.89  | 29.3  | 153.7 | 30.1  | 187   |
| 389 | P40429   | 60S ribosomal protein L13a [OS=Homo sapiens]                                                 | ↑ | 18.961 | 23 | 5 | 23.6  | 10.93 | 8.4   | 110.5 | 129.1 | 152   |
| 390 | Q92769   | Histone deacetylase 2 [OS=Homo sapiens]                                                      | ↓ | 18.941 | 15 | 4 | 55.3  | 5.91  | 127.9 | 91.9  | 93.5  | 86.7  |
| 391 | Q08170   | Serine/arginine-rich splicing factor 4 [OS=Homo sapiens]                                     | ↓ | 18.902 | 9  | 5 | 56.6  | 11.52 | 137.7 | 55.5  | 96.3  | 110.5 |
| 392 | P31483   | nucleolysin TIA-1 isoform p40 [OS=Homo sapiens]                                              | ↓ | 18.882 | 8  | 2 | 42.9  | 7.74  | 136   | 90.9  | 91.8  | 81.3  |
| 393 | P35270   | Septapterin reductase [OS=Homo sapiens]                                                      | ↓ | 18.856 | 20 | 3 | 28    | 8.05  | 150.4 | 59.6  | 120.1 | 69.9  |
| 394 | P19784   | casein kinase II subunit alpha' [OS=Homo sapiens]                                            | ↓ | 18.798 | 12 | 3 | 41.2  | 8.56  | 55.9  | 146.6 | 87    | 110.5 |
| 395 | P24539   | ATP synthase F(0) complex subunit B1, mitochondrial [OS=Homo sapiens]                        | ↓ | 18.709 | 23 | 4 | 28.9  | 9.36  | 130.9 | 74.9  | 102.9 | 91.2  |
| 396 | Q9BYZ2   | L-lactate dehydrogenase A-like 6B [OS=Homo sapiens]                                          | ↑ | 18.635 | 9  | 2 | 41.9  | 8.65  | 69.2  | 141.1 | 90.2  | 99.4  |
| 397 | P08263   | Glutathione S-transferase A1 [OS=Homo sapiens]                                               | ↓ | 18.342 | 17 | 4 | 25.6  | 8.88  | 111.7 | 77.8  | 113.3 | 97.2  |
| 398 | P13987   | CD59 glycoprotein [OS=Homo sapiens]                                                          | ↓ | 18.286 | 25 | 3 | 14.2  | 6.48  | 135   | 77.4  | 96.8  | 90.8  |
| 399 | P46459   | Vesicle-fusing ATPase [OS=Homo sapiens]                                                      | ↓ | 18.199 | 10 | 5 | 82.5  | 6.95  | 152.4 | 88.2  | 91.8  | 67.6  |
| 400 | P20339   | Ras-related protein Rab-5A [OS=Homo sapiens]                                                 | ↓ | 18.067 | 17 | 3 | 23.6  | 8.15  | 130   | 105.2 | 88.8  | 75.9  |
| 401 | O75608   | Acyl-protein thioesterase 1 [OS=Homo sapiens]                                                | ↓ | 18.021 | 24 | 4 | 24.7  | 6.77  | 154.2 | 91.7  | 83.5  | 70.5  |
| 402 | P52788-1 | Spermine synthase [OS=Homo sapiens]                                                          | ↓ | 18.019 | 24 | 4 | 41.2  | 5.02  | 177   | 61.3  | 91.5  | 70.2  |
| 403 | O75821   | Eukaryotic translation initiation factor 3 subunit G [OS=Homo sapiens]                       | ↓ | 17.768 | 12 | 3 | 35.6  | 6.13  | 124.6 | 92.9  | 101.7 | 80.9  |
| 404 | O00264   | Membrane-associated progesterone receptor component 1 [OS=Homo sapiens]                      | ↓ | 17.587 | 23 | 2 | 21.7  | 4.7   | 132.8 | 93    | 99.1  | 75    |
| 405 | Q9UNH7-1 | Sorting nexin-6 [OS=Homo sapiens]                                                            | ↓ | 17.529 | 10 | 4 | 46.6  | 6.16  | 135.2 | 94.8  | 91.1  | 78.8  |
| 406 | P02794   | Ferritin heavy chain [OS=Homo sapiens]                                                       | ↑ | 17.506 | 21 | 4 | 21.2  | 5.55  | 73.2  | 141.8 | 91.6  | 93.4  |
| 407 | Q92522   | Histone H1x [OS=Homo sapiens]                                                                | ↑ | 17.406 | 15 | 3 | 22.5  | 10.76 | 34.6  | 103.9 | 120.2 | 141.2 |
| 408 | P46379-1 | Large proline-rich protein BAG6 [OS=Homo sapiens]                                            | ↓ | 17.401 | 5  | 3 | 119.3 | 5.6   | 162.7 | 83.8  | 56.9  | 96.6  |
| 409 | P06132   | Uroporphyrinogen decarboxylase [OS=Homo sapiens]                                             | ↓ | 17.36  | 18 | 3 | 40.8  | 6.14  | 134.8 | 81.6  | 113.9 | 69.7  |
| 410 | Q9NYL9   | tropomodulin-3 [OS=Homo sapiens]                                                             | ↑ | 17.29  | 14 | 3 | 39.6  | 5.19  | 77.3  | 53.1  | 125.6 | 144   |
| 411 | Q86X29   | Lipolysis-stimulated lipoprotein receptor [OS=Homo sapiens]                                  | ↓ | 17.222 | 4  | 2 | 71.4  | 7.97  | 129.7 | 94.8  | 93.6  | 81.8  |
| 412 | Q8IX12   | Cell division cycle and apoptosis regulator protein 1 [OS=Homo sapiens]                      | ↓ | 17.113 | 3  | 2 | 132.7 | 5.76  | 131.6 | 106.5 | 89.2  | 72.7  |
| 413 | Q9UBL3-1 | Set1/Ash2 histone methyltransferase complex subunit ASH2 [OS=Homo sapiens]                   | ↓ | 17.013 | 8  | 3 | 68.7  | 5.69  | 132   | 103.3 | 115.6 | 49    |
| 414 | P15586   | N-acetylglucosamine-6-sulfatase [OS=Homo sapiens]                                            | ↓ | 16.961 | 10 | 3 | 62    | 8.31  | 134.9 | 96.2  | 100.6 | 68.3  |
| 415 | Q969G3   | SWI/SNF-related matrix-associated actin-dependent regulator of chromatin 1 [OS=Homo sapiens] | ↑ | 16.711 | 9  | 3 | 46.6  | 4.88  | 59.5  | 124.3 | 116.3 | 99.8  |
| 416 | P84098   | 60S ribosomal protein L19 [OS=Homo sapiens]                                                  | ↑ | 16.551 | 18 | 3 | 23.5  | 11.47 | 11.9  | 128.4 | 129.9 | 129.8 |
| 417 | Q8WW59   | SPRY domain-containing protein 4 [OS=Homo sapiens]                                           | ↓ | 16.535 | 28 | 3 | 23.1  | 6.93  | 112.6 | 83.1  | 104.8 | 99.5  |
| 418 | P14091   | Cathepsin E [OS=Homo sapiens]                                                                | ↓ | 16.331 | 9  | 3 | 43.3  | 4.86  | 132.8 | 99.8  | 90.9  | 76.5  |
| 419 | O43747-1 | AP-1 complex subunit gamma-1 [OS=Homo sapiens]                                               | ↓ | 16.268 | 8  | 4 | 91.3  | 6.8   | 115.6 | 104.5 | 109   | 70.9  |
| 420 | O94992   | Protein HEXIM1 [OS=Homo sapiens]                                                             | ↑ | 16.249 | 9  | 2 | 40.6  | 4.89  | 77    | 106.8 | 105.3 | 110.9 |
| 421 | P63000-1 | Ras-related C3 botulinum toxin substrate 1 [OS=Homo sapiens]                                 | ↓ | 15.959 | 29 | 5 | 21.4  | 8.5   | 170.1 | 86    | 94.3  | 49.7  |
| 422 | P48556   | 26S proteasome non-ATPase regulatory subunit 8 [OS=Homo sapiens]                             | ↓ | 15.922 | 9  | 3 | 39.6  | 9.7   | 115.4 | 95.3  | 113.7 | 75.6  |
| 423 | P10619   | lysosomal protective protein [OS=Homo sapiens]                                               | ↓ | 15.891 | 5  | 2 | 54.4  | 6.61  | 142.2 | 95.3  | 86.4  | 76.1  |
| 424 | P56134   | ATP synthase subunit f, mitochondrial [OS=Homo sapiens]                                      | ↑ | 15.837 | 26 | 2 | 10.9  | 9.67  | 71.5  | 102.4 | 104.7 | 121.5 |
| 425 | P15170-3 | Isoform 3 of Eukaryotic peptide chain release factor GTP-binding subunit 1 [OS=Homo sapiens] | ↓ | 15.769 | 5  | 3 | 68.7  | 5.33  | 139.1 | 87.5  | 93.5  | 79.8  |
| 426 | Q14204   | Cytoplasmic dynein 1 heavy chain 1 [OS=Homo sapiens]                                         | ↓ | 15.749 | 2  | 4 | 532.1 | 6.4   | 133.6 | 75.5  | 107.3 | 83.6  |
| 427 | P61086   | Ubiquitin-conjugating enzyme E2 K [OS=Homo sapiens]                                          | ↓ | 15.713 | 29 | 3 | 22.4  | 5.44  | 135.5 | 83.8  | 100   | 80.7  |
| 428 | Q3LXA3   | Triokinase/FMN cyclase [OS=Homo sapiens]                                                     | ↓ | 15.627 | 5  | 2 | 58.9  | 7.49  | 137.4 | 74.4  | 103.2 | 85    |
| 429 | Q9H8Y8-1 | Golgi reassembly-stacking protein 2 [OS=Homo sapiens]                                        | ↓ | 15.536 | 7  | 2 | 47.1  | 4.82  | 145.4 | 77.4  | 104   | 73.2  |
| 430 | Q04323-1 | UBX domain-containing protein 1 [OS=Homo sapiens]                                            | ↓ | 15.472 | 10 | 2 | 33.3  | 5.25  | 132.1 | 121.5 | 32.2  | 114.1 |
| 431 | Q0343-1  | TBC1 domain family member 4 [OS=Homo sapiens]                                                | ↓ | 15.459 | 3  | 3 | 146.5 | 7.01  | 121.1 | 80.5  | 118.3 | 80.2  |
| 432 | Q9UHN6-1 | Cell surface hyaluronidase [OS=Homo sapiens]                                                 | ↓ | 15.441 | 6  | 4 | 154.3 | 8.15  | 121.2 | 94.2  | 112.9 | 71.7  |
| 433 | Q13404   | Ubiquitin-conjugating enzyme E2 variant 1 [OS=Homo sapiens]                                  | ↓ | 15.329 | 24 | 4 | 16.5  | 7.93  | 156.7 | 82.6  | 91.6  | 69    |
| 434 | Q9NSD9   | Phenylalanine--tRNA ligase beta subunit [OS=Homo sapiens]                                    | ↓ | 15.226 | 6  | 4 | 66.1  | 6.84  | 190.3 | 98.5  | 68.4  | 42.8  |
| 435 | Q8NFH4   | Nucleoporin Nup37 [OS=Homo sapiens]                                                          | ↑ | 15.129 | 20 | 4 | 36.7  | 5.92  | 59    | 93.5  | 119.2 | 128.2 |
| 436 | P49959   | Double-strand break repair protein MRE11 [OS=Homo sapiens]                                   | ↓ | 15.118 | 8  | 3 | 80.5  | 5.9   | 174.1 | 84    | 86.3  | 55.6  |
| 437 | B5ME19   | eukaryotic translation initiation factor 3 subunit C-like protein [OS=Homo sapiens]          | ↓ | 15.108 | 4  | 3 | 105.4 | 5.64  | 114.5 | 106   | 105.1 | 74.4  |
| 438 | P61019-1 | Ras-related protein Rab-2A [OS=Homo sapiens]                                                 | ↓ | 14.999 | 13 | 2 | 23.5  | 6.54  | 121.7 | 102.5 | 95.7  | 80.1  |
| 439 | Q8N684-1 | Cleavage and polyadenylation specificity factor subunit 7 [OS=Homo sapiens]                  | ↓ | 14.937 | 8  | 2 | 52    | 8     | 180.4 | 44.9  | 42.1  | 132.7 |
| 440 | O96019-1 | Actin-like protein 6A [OS=Homo sapiens]                                                      | ↓ | 14.69  | 9  | 2 | 47.4  | 5.6   | 132.3 | 105.3 | 93.4  | 68.9  |

|     |          |                                                                                                  |   |        |    |   |       |       |       |       |       |       |
|-----|----------|--------------------------------------------------------------------------------------------------|---|--------|----|---|-------|-------|-------|-------|-------|-------|
| 441 | P46779   | 60S ribosomal protein L28 [OS=Homo sapiens]                                                      | ↑ | 14.688 | 22 | 3 | 15.7  | 12.02 | 36.8  | 110   | 121.4 | 131.7 |
| 442 | P01024   | Complement C3 [OS=Homo sapiens]                                                                  | ↑ | 14.67  | 2  | 3 | 187   | 6.4   | 49.4  | 102.4 | 117.5 | 130.7 |
| 443 | P22352   | Glutathione peroxidase 3 [OS=Homo sapiens]                                                       | ↑ | 14.553 | 14 | 3 | 25.5  | 8.13  | 51.9  | 159   | 74    | 115.1 |
| 444 | Q13564-1 | NEDD8-activating enzyme E1 regulatory subunit [OS=Homo sapiens]                                  | ↓ | 14.517 | 10 | 3 | 60.2  | 5.4   | 145.9 | 90.6  | 90.5  | 73    |
| 445 | O95861-1 | 3'(2'),5'-bisphosphate nucleotidase 1 [OS=Homo sapiens]                                          | ↓ | 14.514 | 20 | 3 | 33.4  | 5.69  | 153.3 | 77.3  | 92.5  | 76.9  |
| 446 | Q9UN86   | Ras GTPase-activating protein-binding protein 2 [OS=Homo sapiens]                                | ↓ | 14.388 | 6  | 2 | 54.1  | 5.55  | 106.8 | 96.9  | 103.5 | 92.7  |
| 447 | P46776   | 60S ribosomal protein L27a [OS=Homo sapiens]                                                     | ↑ | 14.378 | 20 | 3 | 16.6  | 11    | 58.2  | 124.8 | 121   | 96    |
| 448 | Q9NXG2   | THUMP domain-containing protein 1 [OS=Homo sapiens]                                              | ↓ | 14.186 | 7  | 2 | 39.3  | 7.88  | 132.2 | 95.3  | 97.5  | 75    |
| 449 | O14980   | Exportin-1 [OS=Homo sapiens]                                                                     | ↓ | 14.178 | 4  | 3 | 123.3 | 6.06  | 123.8 | 71.7  | 107.2 | 97.4  |
| 450 | P61513   | 60S ribosomal protein L37a [OS=Homo sapiens]                                                     | ↑ | 14.16  | 41 | 3 | 10.3  | 10.43 | 54.5  | 123.4 | 120.9 | 101.2 |
| 451 | Q00325-2 | Isoform B of Phosphate carrier protein, mitochondrial [OS=Homo sapiens]                          | ↓ | 13.953 | 15 | 4 | 39.9  | 9.36  | 103.6 | 74.8  | 131.7 | 89.9  |
| 452 | P20774   | Mimecan [OS=Homo sapiens]                                                                        | ↑ | 13.899 | 6  | 2 | 33.9  | 5.63  | 20.9  | 39.9  | 294.9 | 44.2  |
| 453 | Q92900   | Regulator of nonsense transcripts 1 [OS=Homo sapiens]                                            | ↓ | 13.886 | 4  | 4 | 124.3 | 6.61  | 139.8 | 96.3  | 93.8  | 70.1  |
| 454 | P53990-1 | IST1 homolog [OS=Homo sapiens]                                                                   | ↑ | 13.868 | 10 | 3 | 39.7  | 5.35  | 80.6  | 99.4  | 115.2 | 104.8 |
| 455 | P61923   | Coatomer subunit zeta-1 [OS=Homo sapiens]                                                        | ↓ | 13.696 | 16 | 2 | 20.2  | 4.81  | 146.1 | 108.1 | 100.5 | 45.3  |
| 456 | Q8TBC4-1 | NEDD8-activating enzyme E1 catalytic subunit [OS=Homo sapiens]                                   | ↑ | 13.62  | 11 | 3 | 51.8  | 5.45  | 60    | 112.9 | 109.9 | 117.2 |
| 457 | Q9H4A6   | Golgi phosphoprotein 3 [OS=Homo sapiens]                                                         | ↓ | 13.581 | 18 | 3 | 33.8  | 6.44  | 199.3 | 72    | 65.9  | 62.8  |
| 458 | P08195   | 4F2 cell-surface antigen heavy chain [OS=Homo sapiens]                                           | ↓ | 13.572 | 4  | 2 | 68    | 5.01  | 151.5 | 95.8  | 102.9 | 49.8  |
| 459 | Q13557   | Calcium/calmodulin-dependent protein kinase type II subunit delta [OS=Homo sapiens]              | ↓ | 13.297 | 8  | 3 | 56.3  | 7.25  | 135.1 | 86    | 102.4 | 76.5  |
| 460 | P61026   | ras-related protein rab-10 [OS=Homo sapiens]                                                     | ↓ | 13.179 | 15 | 3 | 22.5  | 8.38  | 126.4 | 124.1 | 84    | 65.5  |
| 461 | P49915   | GMP synthase [glutamine-hydrolyzing] [OS=Homo sapiens]                                           | ↑ | 13.029 | 5  | 3 | 76.7  | 6.87  | 155.2 | 101.3 | 102.5 | 41    |
| 462 | Q01581   | hydroxymethylglutaryl-CoA synthase, cytoplasmic [OS=Homo sapiens]                                | ↓ | 13.013 | 7  | 3 | 57.3  | 5.41  | 114.2 | 79.3  | 126.8 | 79.7  |
| 463 | Q8WVM8   | Sec1 family domain-containing protein 1 [OS=Homo sapiens]                                        | ↓ | 12.965 | 5  | 2 | 72.3  | 6.27  | 160.9 | 85.6  | 87.5  | 66    |
| 464 | P02689   | Myelin P2 protein [OS=Homo sapiens]                                                              | ↑ | 12.927 | 14 | 2 | 14.9  | 9.83  | 77    | 144.7 | 101.5 | 76.8  |
| 465 | Q05519   | serine/arginine-rich splicing factor 11 [OS=Homo sapiens]                                        | ↓ | 12.904 | 8  | 2 | 53.5  | 10.52 | 162   | 82.6  | 59.3  | 96.2  |
| 466 | O43237   | Cytoplasmic dynein 1 light intermediate chain 2 [OS=Homo sapiens]                                | ↓ | 12.894 | 16 | 3 | 54.1  | 6.38  | 154.6 | 97.5  | 84.4  | 63.4  |
| 467 | P02790   | Hemopexin [OS=Homo sapiens]                                                                      | ↑ | 12.664 | 7  | 4 | 51.6  | 7.02  | 75.9  | 142.5 | 82.4  | 99.2  |
| 468 | P17480-1 | Nucleolar transcription factor 1 [OS=Homo sapiens]                                               | ↑ | 12.662 | 5  | 3 | 89.4  | 5.81  | 64.5  | 108.8 | 107.4 | 119.3 |
| 469 | Q9NZL4-1 | Hsp70-binding protein 1 [OS=Homo sapiens]                                                        | ↓ | 12.642 | 10 | 2 | 39.4  | 5.21  | 140.6 | 57.9  | 108.8 | 92.6  |
| 470 | P08559   | Pyruvate dehydrogenase E1 component subunit alpha, somatic form, mitochondrial [OS=Homo sapiens] | ↓ | 12.483 | 14 | 3 | 43.3  | 8.06  | 123.6 | 94.6  | 99.9  | 81.9  |
| 471 | P61201-1 | COP9 signalosome complex subunit 2 [OS=Homo sapiens]                                             | ↑ | 12.353 | 9  | 2 | 51.6  | 5.53  | 46.9  | 124.3 | 134.9 | 93.9  |
| 472 | O43823   | A-kinase anchor protein 8 [OS=Homo sapiens]                                                      | ↓ | 12.344 | 5  | 2 | 76.1  | 5.15  | 136.2 | 76.1  | 102.7 | 85    |
| 473 | O75251   | NADH dehydrogenase [ubiquinone] iron-sulfur protein 7, mitochondrial [OS=Homo sapiens]           | ↓ | 12.305 | 17 | 2 | 23.5  | 9.99  | 140.4 | 83    | 106.4 | 70.2  |
| 474 | Q08752   | peptidyl-prolyl cis-trans isomerase D [OS=Homo sapiens]                                          | ↑ | 12.259 | 9  | 3 | 40.7  | 7.21  | 56.7  | 121.6 | 110.5 | 111.2 |
| 475 | Q9BRP8   | Partner of Y14 and mago [OS=Homo sapiens]                                                        | ↑ | 12.221 | 14 | 2 | 22.6  | 9.45  | 84.5  | 74.9  | 128.1 | 112.5 |
| 476 | Q9UQE7   | Structural maintenance of chromosomes protein 3 [OS=Homo sapiens]                                | ↓ | 12.114 | 2  | 2 | 141.5 | 7.18  | 149.7 | 99.7  | 83.6  | 67    |
| 477 | P14555   | Phospholipase A2, membrane associated [OS=Homo sapiens]                                          | ↑ | 11.93  | 17 | 2 | 16.1  | 9.23  | 20.1  | 31.6  | 29.9  | 318.4 |
| 478 | P13674-1 | prolyl 4-hydroxylase subunit alpha-1 [OS=Homo sapiens]                                           | ↓ | 11.862 | 5  | 2 | 61    | 6.01  | 139.9 | 120.3 | 50.7  | 89.1  |
| 479 | Q13084   | 39S ribosomal protein L28, mitochondrial [OS=Homo sapiens]                                       | ↓ | 11.84  | 16 | 3 | 30.1  | 8.29  | 107.8 | 90.7  | 85.6  | 115.9 |
| 480 | Q9Y262   | eukaryotic translation initiation factor 3 subunit L [OS=Homo sapiens]                           | ↓ | 11.8   | 5  | 2 | 66.7  | 6.34  | 197.8 | 72.1  | 72.4  | 57.7  |
| 481 | Q9BXP5   | serrate RNA effector molecule homolog [OS=Homo sapiens]                                          | ↓ | 11.799 | 7  | 2 | 100.6 | 5.96  | 128.7 | 72.8  | 104.4 | 94.1  |
| 482 | Q9H444   | Charged multivesicular body protein 4b [OS=Homo sapiens]                                         | ↑ | 11.793 | 11 | 2 | 24.9  | 4.82  | 77.7  | 95.3  | 102.9 | 124.1 |
| 483 | Q8NE71-1 | ATP-binding cassette sub-family F member 1 [OS=Homo sapiens]                                     | ↓ | 11.694 | 3  | 2 | 95.9  | 6.8   | 138.5 | 75.2  | 113.7 | 72.7  |
| 484 | P12111   | Collagen alpha-3(VI) chain [OS=Homo sapiens]                                                     | ↑ | 11.678 | 1  | 2 | 343.5 | 6.68  | 52.3  | 167.2 | 81.1  | 99.4  |
| 485 | Q02809   | Procollagen-lysine,2-oxoglutarate 5-dioxygenase 1 [OS=Homo sapiens]                              | ↓ | 11.617 | 4  | 2 | 83.5  | 6.95  | 135   | 100.4 | 90    | 74.6  |
| 486 | Q2TAA2   | Isoamyl acetate-hydrolyzing esterase 1 homolog [OS=Homo sapiens]                                 | ↓ | 11.59  | 11 | 2 | 27.6  | 5.3   | 141   | 93.9  | 97.2  | 67.9  |
| 487 | P07947   | tyrosine-protein kinase Yes [OS=Homo sapiens]                                                    | ↓ | 11.589 | 5  | 3 | 60.8  | 6.74  | 150.2 | 81.4  | 96.8  | 71.5  |
| 488 | Q9UBF2   | Coatomer subunit gamma-2 [OS=Homo sapiens]                                                       | ↓ | 11.582 | 4  | 2 | 97.6  | 5.81  | 138.7 | 92.7  | 107.3 | 61.3  |
| 489 | Q9BVK6   | Transmembrane emp24 domain-containing protein 9 [OS=Homo sapiens]                                | ↓ | 11.525 | 9  | 3 | 27.3  | 8.02  | 189.3 | 45.9  | 131.7 | 33.1  |
| 490 | Q14978-1 | nucleolar and coiled-body phosphoprotein 1 [OS=Homo sapiens]                                     | ↑ | 11.515 | 4  | 2 | 73.6  | 9.47  | 64.1  | 98.1  | 130.9 | 106.8 |
| 491 | P13807   | glycogen [starch] synthase, muscle [OS=Homo sapiens]                                             | ↑ | 11.507 | 4  | 2 | 83.7  | 6.18  | 60.8  | 117.3 | 151.4 | 70.5  |
| 492 | Q9NR31   | GTP-binding protein SAR1a [OS=Homo sapiens]                                                      | ↓ | 11.448 | 12 | 2 | 22.4  | 6.68  | 140.5 | 100   | 87.2  | 72.2  |
| 493 | Q16698   | 2,4-dienoyl-CoA reductase, mitochondrial [OS=Homo sapiens]                                       | ↓ | 11.376 | 8  | 3 | 36    | 9.28  | 202.2 | 60.6  | 76.9  | 60.4  |
| 494 | P00488   | Coagulation factor XIII A chain [OS=Homo sapiens]                                                | ↑ | 11.305 | 4  | 3 | 83.2  | 6.09  | 69.5  | 144.6 | 75.7  | 110.3 |
| 495 | Q9Y2W2   | WW domain-binding protein 11 [OS=Homo sapiens]                                                   | ↑ | 11.21  | 5  | 3 | 70    | 8.38  | 58    | 60.6  | 178.1 | 103.3 |
| 496 | P51884   | Lumican [OS=Homo sapiens]                                                                        | ↑ | 11.136 | 6  | 2 | 38.4  | 6.61  | 54.7  | 171.6 | 82.9  | 90.8  |
| 497 | P15374   | Ubiquitin carboxyl-terminal hydrolase isozyme L3 [OS=Homo sapiens]                               | ↑ | 11.079 | 11 | 2 | 26.2  | 4.92  | 116   | 115.9 | 93.4  | 74.7  |
| 498 | O95394   | phosphoacetylglucosamine mutase [OS=Homo sapiens]                                                | ↓ | 10.96  | 9  | 2 | 59.8  | 6.25  | 145.2 | 81.3  | 98.3  | 75.1  |
| 499 | O75306-1 | NADH dehydrogenase [ubiquinone] iron-sulfur protein 2, mitochondrial [OS=Homo sapiens]           | ↓ | 10.931 | 6  | 3 | 52.5  | 7.55  | 149.5 | 73    | 103.7 | 73.8  |
| 500 | P21810   | biglycan [OS=Homo sapiens]                                                                       | ↑ | 10.923 | 7  | 2 | 41.6  | 7.52  | 63.9  | 143.1 | 87.1  | 105.9 |
| 501 | O95571   | Persulfide dioxygenase ETHE1, mitochondrial [OS=Homo sapiens]                                    | ↓ | 10.906 | 11 | 2 | 27.9  | 6.83  | 137.9 | 96    | 86.2  | 80    |
| 502 | P13073   | Cytochrome c oxidase subunit 4 isoform 1, mitochondrial [OS=Homo sapiens]                        | ↓ | 10.833 | 20 | 3 | 19.6  | 9.51  | 139.4 | 70.3  | 102.1 | 88.2  |
| 503 | Q9Y277   | Voltage-dependent anion-selective channel protein 3 [OS=Homo sapiens]                            | ↓ | 10.816 | 9  | 2 | 30.6  | 8.66  | 102.8 | 78.2  | 109.8 | 109.2 |



|     |          |                                                                                             |   |        |    |   |       |       |       |       |       |       |
|-----|----------|---------------------------------------------------------------------------------------------|---|--------|----|---|-------|-------|-------|-------|-------|-------|
| 504 | O00487   | 26S proteasome non-ATPase regulatory subunit 14 [OS=Homo sapiens]                           | ↓ | 10.721 | 15 | 2 | 34.6  | 6.52  | 141.1 | 93.6  | 91.1  | 74.2  |
| 505 | O60716-1 | Catenin delta-1 [OS=Homo sapiens]                                                           | ↓ | 10.72  | 4  | 3 | 108.1 | 6.23  | 134.7 | 92.2  | 98.4  | 74.7  |
| 506 | Q9NNW7-1 | thioredoxin reductase 2, mitochondrial [OS=Homo sapiens]                                    | ↑ | 10.698 | 6  | 2 | 56.5  | 7.5   | 69.2  | 111.3 | 99.1  | 120.4 |
| 507 | P19404   | NADH dehydrogenase [ubiquinone] flavoprotein 2, mitochondrial [OS=Homo sapiens]             | ↓ | 10.676 | 10 | 2 | 27.4  | 8.06  | 161.7 | 54.7  | 145.9 | 37.8  |
| 508 | Q99460   | 26S proteasome non-ATPase regulatory subunit 1 [OS=Homo sapiens]                            | ↓ | 10.645 | 4  | 3 | 105.8 | 5.39  | 144.2 | 106.6 | 80.3  | 68.9  |
| 509 | Q8NBX0   | saccharopine dehydrogenase-like oxidoreductase [OS=Homo sapiens]                            | ↑ | 10.625 | 8  | 3 | 47.1  | 9.14  | 87.6  | 160.1 | 85.3  | 67.1  |
| 510 | P25189   | Myelin protein P0 [OS=Homo sapiens]                                                         | ↑ | 10.623 | 12 | 3 | 27.5  | 9.54  | 67.5  | 73    | 100.3 | 159.2 |
| 511 | O75822   | Eukaryotic translation initiation factor 3 subunit J [OS=Homo sapiens]                      | ↑ | 10.619 | 12 | 3 | 29    | 4.83  | 85    | 145.7 | 84.2  | 85.1  |
| 512 | P49792   | E3 SUMO-protein ligase RanBP2 [OS=Homo sapiens]                                             | ↓ | 10.564 | 2  | 2 | 358   | 6.2   | 131.8 | 83.5  | 87.5  | 97.3  |
| 513 | O94903   | Pyridoxal phosphate homeostasis protein [OS=Homo sapiens]                                   | ↓ | 10.472 | 8  | 2 | 30.3  | 7.5   | 155   | 71.8  | 105.8 | 67.5  |
| 514 | O60256-1 | Phosphoribosyl pyrophosphate synthase-associated protein 2 [OS=Homo sapiens]                | ↓ | 10.432 | 7  | 2 | 40.9  | 7.44  | 146.7 | 107.7 | 84.9  | 60.7  |
| 515 | O75947-1 | ATP synthase subunit d, mitochondrial [OS=Homo sapiens]                                     | ↓ | 10.295 | 16 | 2 | 18.5  | 5.3   | 118.3 | 74.6  | 98.7  | 108.5 |
| 516 | P49903-1 | Selenide, water dikinase 1 [OS=Homo sapiens]                                                | ↓ | 10.229 | 7  | 2 | 42.9  | 5.97  | 102   | 98.8  | 100.2 | 98.9  |
| 517 | O60613-1 | selenoprotein F [OS=Homo sapiens]                                                           | ↓ | 10.176 | 18 | 2 | 17.8  | 5.03  | 131.4 | 94.7  | 99.5  | 74.4  |
| 518 | P20142   | Gastricrin [OS=Homo sapiens]                                                                | ↓ | 9.912  | 5  | 2 | 42.4  | 4.46  | 180   | 83.3  | 81.3  | 55.3  |
| 519 | P62495   | Eukaryotic peptide chain release factor subunit 1 [OS=Homo sapiens]                         | ↓ | 9.876  | 9  | 2 | 49    | 5.71  | 138   | 99.2  | 87.1  | 75.7  |
| 520 | P61970   | nuclear transport factor 2 [OS=Homo sapiens]                                                | ↓ | 9.799  | 19 | 2 | 14.5  | 5.38  | 136.9 | 85.7  | 92.8  | 84.6  |
| 521 | P13688-1 | Carcinoembryonic antigen-related cell adhesion molecule 1 [OS=Homo sapiens]                 | ↑ | 9.647  | 7  | 2 | 57.5  | 5.97  | 78.4  | 101   | 103   | 117.6 |
| 522 | Q9UJ50   | Calcium-binding mitochondrial carrier protein Aralar2 [OS=Homo sapiens]                     | ↓ | 9.521  | 4  | 2 | 74.1  | 8.62  | 131.9 | 82    | 104.8 | 81.3  |
| 523 | O14841   | 5-oxoprolinase [OS=Homo sapiens]                                                            | ↓ | 9.423  | 3  | 2 | 137.4 | 6.58  | 148.9 | 116.2 | 81.5  | 53.4  |
| 524 | P36952-1 | Serp1 B5 [OS=Homo sapiens]                                                                  | ↓ | 9.288  | 9  | 2 | 42.1  | 6.05  | 126.2 | 105.8 | 77.8  | 90.1  |
| 525 | Q93009   | Ubiquitin carboxyl-terminal hydrolase 7 [OS=Homo sapiens]                                   | ↓ | 9.261  | 3  | 3 | 128.2 | 5.55  | 209.8 | 71.5  | 79.5  | 39.2  |
| 526 | P63151   | Serine/threonine-protein phosphatase 2A 55 kDa regulatory subunit B alpha [OS=Homo sapiens] | ↑ | 9.207  | 5  | 2 | 51.7  | 6.2   | 83.9  | 97.5  | 123.2 | 95.4  |
| 527 | P26640   | Valine--tRNA ligase [OS=Homo sapiens]                                                       | ↓ | 9.121  | 5  | 2 | 140.4 | 7.59  | 182.8 | 177   | 19.8  | 20.4  |
| 528 | P53992   | Protein transport protein sec24c [OS=Homo sapiens]                                          | ↓ | 9.109  | 3  | 2 | 118.2 | 7.06  | 218.5 | 105.5 | 43.7  | 32.4  |
| 529 | P21980   | Protein-glutamine gamma-glutamyltransferase 2 [OS=Homo sapiens]                             | ↓ | 8.98   | 5  | 2 | 77.3  | 5.22  | 147   | 106.6 | 85.4  | 61.1  |
| 530 | P84095   | Rho-related GTP-binding protein RhoG [OS=Homo sapiens]                                      | ↓ | 8.912  | 19 | 2 | 21.3  | 8.12  | 142.9 | 122.4 | 85.4  | 49.2  |
| 531 | Q9H5N1   | rab GTPase-binding effector protein 2 [OS=Homo sapiens]                                     | ↓ | 8.672  | 4  | 2 | 63.5  | 4.78  | 121.9 | 106.7 | 97.8  | 73.5  |
| 532 | Q5VW32   | BRO1 domain-containing protein BROX [OS=Homo sapiens]                                       | ↓ | 8.635  | 11 | 2 | 46.4  | 7.65  | 120.2 | 77    | 116.5 | 86.4  |
| 533 | P61077-1 | Ubiquitin-conjugating enzyme E2 D3 [OS=Homo sapiens]                                        | ↓ | 8.553  | 24 | 2 | 16.7  | 7.8   | 136.2 | 99.2  | 84.4  | 80.2  |
| 534 | P21741   | Midkine [OS=Homo sapiens]                                                                   | ↑ | 8.548  | 12 | 2 | 15.6  | 9.79  | 50.2  | 119   | 100.7 | 130.1 |
| 535 | O00483   | Cytochrome c oxidase subunit NDUFA4 [OS=Homo sapiens]                                       | ↓ | 8.505  | 22 | 2 | 9.4   | 9.38  | 152.6 | 96.9  | 80.7  | 62.7  |
| 536 | P53007   | Tricarboxylate transport protein, mitochondrial [OS=Homo sapiens]                           | ↑ | 8.392  | 8  | 2 | 34    | 9.89  | 64.9  | 115.9 | 115.8 | 103.4 |
| 537 | P53996-1 | ATP-citrate synthase [OS=Homo sapiens]                                                      | ↓ | 8.314  | 4  | 3 | 120.8 | 7.33  | 157.8 | 83.7  | 95.4  | 63.1  |
| 538 | O00233-1 | 26S proteasome non-ATPase regulatory subunit 9 [OS=Homo sapiens]                            | ↑ | 8.3    | 9  | 2 | 24.7  | 6.95  | 66.7  | 108.2 | 104.2 | 120.8 |
| 539 | Q6DD88   | Atlastin-3 [OS=Homo sapiens]                                                                | ↑ | 8.284  | 8  | 2 | 60.5  | 5.66  | 55.1  | 121.5 | 124.7 | 98.8  |
| 540 | O00159-1 | Unconventional myosin-Ic [OS=Homo sapiens]                                                  | ↑ | 8.28   | 3  | 2 | 121.6 | 9.41  | 73.2  | 115.8 | 128.9 | 82.1  |
| 541 | P43251   | Biotinidase [OS=Homo sapiens]                                                               | ↑ | 8.239  | 4  | 2 | 61.1  | 6.25  | 57.1  | 100.5 | 128.8 | 113.6 |
| 542 | P60228   | Eukaryotic translation initiation factor 3 subunit E [OS=Homo sapiens]                      | ↓ | 8.172  | 4  | 2 | 52.2  | 6.04  | 143.3 | 124.6 | 77.7  | 54.4  |
| 543 | Q9Y285   | Phenylalanine--tRNA ligase alpha subunit [OS=Homo sapiens]                                  | ↓ | 8.15   | 6  | 2 | 57.5  | 7.8   | 141.5 | 97.1  | 98.7  | 62.7  |
| 544 | Q9Y6Y8   | SEC23-interacting protein [OS=Homo sapiens]                                                 | ↓ | 8.059  | 4  | 2 | 111   | 5.54  | 175.8 | 81.6  | 85.8  | 56.7  |
| 545 | P08240-1 | signal recognition particle receptor subunit alpha [OS=Homo sapiens]                        | ↓ | 8.057  | 7  | 2 | 69.8  | 8.95  | 140.7 | 31.7  | 211.3 | 16.3  |
| 546 | P49590   | probable histidine--tRNA ligase, mitochondrial [OS=Homo sapiens]                            | ↓ | 8.019  | 4  | 2 | 56.9  | 8.24  | 132.9 | 86.2  | 99.2  | 81.8  |
| 547 | P61006   | Ras-related protein Rab-8A [OS=Homo sapiens]                                                | ↓ | 8.012  | 9  | 2 | 23.7  | 9.07  | 131.6 | 77.6  | 102.4 | 88.4  |
| 548 | P52948-1 | nuclear pore complex protein Nup98-Nup96 [OS=Homo sapiens]                                  | ↓ | 8.002  | 1  | 2 | 197.5 | 6.4   | 165.5 | 111.2 | 63    | 60.4  |
| 549 | P30837   | Aldehyde dehydrogenase X, mitochondrial [OS=Homo sapiens]                                   | ↑ | 7.824  | 5  | 2 | 57.2  | 6.8   | 56.6  | 85.1  | 114.7 | 143.5 |
| 550 | Q9P0J0   | NADH dehydrogenase [ubiquinone] 1 alpha subcomplex subunit 13 [OS=Homo sapiens]             | ↓ | 7.817  | 17 | 2 | 16.7  | 8.43  | 164.1 | 77.8  | 96.2  | 61.9  |
| 551 | P52888   | thimet oligopeptidase [OS=Homo sapiens]                                                     | ↑ | 7.637  | 3  | 2 | 78.8  | 6.05  | 64.2  | 115.4 | 107.7 | 112.7 |
| 552 | P19623   | spermidine synthase [OS=Homo sapiens]                                                       | ↓ | 7.629  | 6  | 2 | 33.8  | 5.49  | 153.6 | 93.4  | 87.4  | 65.7  |
| 553 | P22061   | protein-L-isoaspartate(D-aspartate) O-methyltransferase [OS=Homo sapiens]                   | ↓ | 7.408  | 10 | 2 | 24.6  | 7.21  | 167.9 | 102.9 | 82.3  | 46.9  |
| 554 | Q13177   | Serine/threonine-protein kinase PAK 2 [OS=Homo sapiens]                                     | ↓ | 7.403  | 5  | 2 | 58    | 5.96  | 153   | 90.9  | 89    | 67.1  |
| 555 | P18077   | 60S ribosomal protein L35a [OS=Homo sapiens]                                                | ↑ | 7.315  | 21 | 3 | 12.5  | 11.06 | 43.1  | 113.3 | 116   | 127.6 |
| 556 | P50552   | Vasodilator-stimulated phosphoprotein [OS=Homo sapiens]                                     | ↓ | 7.314  | 6  | 2 | 39.8  | 8.94  | 123.5 | 97.9  | 94.3  | 84.3  |
| 557 | Q95758-1 | Isoform 1 of Polypyrimidine tract-binding protein 3 [OS=Homo sapiens]                       | ↓ | 7.218  | 3  | 2 | 56.5  | 9.22  | 130.2 | 103.5 | 95.1  | 71.1  |
| 558 | Q9UEY8-1 | Gamma-adducin [OS=Homo sapiens]                                                             | ↓ | 7.089  | 3  | 2 | 79.1  | 6.32  | 118.2 | 107.3 | 104.9 | 69.6  |
| 559 | P61254   | 60S ribosomal protein L26 [OS=Homo sapiens]                                                 | ↑ | 6.968  | 17 | 3 | 17.2  | 10.55 | 34.3  | 120.3 | 130.6 | 114.9 |
| 560 | Q9UHY1   | Nuclear receptor-binding protein [OS=Homo sapiens]                                          | ↓ | 6.945  | 6  | 2 | 59.8  | 5.08  | 181.5 | 86.8  | 60.1  | 71.6  |
| 561 | Q9GZP4   | P1TH domain-containing protein 1 [OS=Homo sapiens]                                          | ↑ | 6.873  | 14 | 2 | 24.2  | 5.74  | 56.1  | 94.5  | 85.7  | 163.7 |
| 562 | O15164   | Transcription intermediary factor 1-alpha [OS=Homo sapiens]                                 | ↓ | 6.798  | 3  | 2 | 116.8 | 7.11  | 142.6 | 66.6  | 113.2 | 77.6  |
| 563 | Q9BZE9   | tether containing UBX domain for GLUT4 [OS=Homo sapiens]                                    | ↓ | 6.632  | 6  | 2 | 60.1  | 6.64  | 116.4 | 91.4  | 104.7 | 87.6  |
| 564 | P61457   | Pterin-4-alpha-carbinolamine dehydratase [OS=Homo sapiens]                                  | ↓ | 6.489  | 23 | 2 | 12    | 6.8   | 161   | 70.2  | 99.8  | 68.9  |
| 565 | P09001   | 39S ribosomal protein L3, mitochondrial [OS=Homo sapiens]                                   | ↑ | 6.298  | 7  | 2 | 38.6  | 9.48  | 83.7  | 56    | 129.6 | 130.7 |
| 566 | Q99611   | Selenide, water dikinase 2 [OS=Homo sapiens]                                                | ↓ | 6.244  | 7  | 2 | 47.3  | 5.88  | 133.2 | 97.3  | 89.6  | 79.8  |

|     |          |                                                                        |   |       |    |   |       |       |       |       |       |       |
|-----|----------|------------------------------------------------------------------------|---|-------|----|---|-------|-------|-------|-------|-------|-------|
| 567 | Q96FX7   | tRNA (adenine(58)-N(1))-methyltransferase catalytic subunit TRMT61A [C | ↓ | 6.085 | 13 | 2 | 31.4  | 7.36  | 209.1 | 47.1  | 89.9  | 54    |
| 568 | O15042   | U2 snRNP-associated SURP motif-containing protein [OS=Homo sapien      | ↓ | 6.071 | 3  | 3 | 118.2 | 8.47  | 130.3 | 103.7 | 86    | 80.1  |
| 569 | Q8NBJ4   | Golgi membrane protein 1 [OS=Homo sapiens]                             | ↓ | 5.979 | 6  | 2 | 45.3  | 4.97  | 134   | 66.4  | 106   | 93.6  |
| 570 | Q14166   | Tubulin--tyrosine ligase-like protein 12 [OS=Homo sapiens]             | ↓ | 5.956 | 3  | 2 | 74.4  | 5.53  | 147.7 | 81.7  | 107.4 | 63.3  |
| 571 | P56545   | c-terminal-binding protein 2 [OS=Homo sapiens]                         | ↓ | 5.931 | 4  | 2 | 48.9  | 6.95  | 132.1 | 111.1 | 99    | 57.9  |
| 572 | Q9H9H4   | Vacuolar protein sorting-associated protein 37B [OS=Homo sapiens]      | ↑ | 5.786 | 10 | 2 | 31.3  | 7.34  | 36.9  | 111.6 | 75.8  | 175.7 |
| 573 | P51580   | Thiopurine S-methyltransferase [OS=Homo sapiens]                       | ↓ | 5.765 | 9  | 2 | 28.2  | 6.23  | 168.1 | 105.2 | 102.6 | 24.1  |
| 574 | Q93034   | Cullin-5 [OS=Homo sapiens]                                             | ↓ | 5.42  | 5  | 2 | 90.9  | 7.94  | 131.1 | 127.5 | 116.2 | 25.3  |
| 575 | P02649   | Apolipoprotein E [OS=Homo sapiens]                                     | ↑ | 5.333 | 5  | 2 | 36.1  | 5.73  | 75.6  | 190.8 | 58.1  | 75.5  |
| 576 | P23141   | Liver carboxylesterase 1 [OS=Homo sapiens]                             | ↑ | 5.214 | 4  | 2 | 62.5  | 6.6   | 66    | 137   | 96    | 101   |
| 577 | Q15746-1 | Myosin light chain kinase, smooth muscle [OS=Homo sapiens]             | ↓ | 5.052 | 1  | 2 | 210.6 | 6.15  | 134.6 | 104.2 | 101.6 | 59.6  |
| 578 | P09669   | Cytochrome c oxidase subunit 6C [OS=Homo sapiens]                      | ↓ | 4.745 | 20 | 2 | 8.8   | 10.39 | 182.9 | 67.2  | 85.4  | 64.5  |
| 579 | P02452   | Collagen alpha-1(I) chain [OS=Homo sapiens]                            | ↑ | 3.976 | 2  | 2 | 138.9 | 5.8   | 49.6  | 152.9 | 110.7 | 86.8  |
| 580 | P28482   | mitogen-activated protein kinase 1 [OS=Homo sapiens]                   | ↓ | 3.921 | 9  | 2 | 41.4  | 6.98  | 146   | 96.1  | 91.4  | 66.4  |
| 581 | Q15031   | Probable Leucine--tRNA ligase, mitochondrial [OS=Homo sapiens]         | ↓ | 3.915 | 5  | 2 | 101.9 | 8.22  | 141   | 73.5  | 108.1 | 77.4  |
| 582 | Q9Y6V0-1 | Protein piccolo [OS=Homo sapiens]                                      | ↑ | 2.807 | 1  | 2 | 552.9 | 6.51  | 67.6  | 105   | 129.5 | 97.9  |
